# Supplementary material for: Nickel-catalysed cycloaddition oligomerisation of 1,6-diynes to medium-size cyclic polyenes
Source: Royal Society of Chemistry journal article supplement (doi:10.1039/d2py01033j), 2022-01-01

## Supplementary Information

For

### **Nickel-Catalysed Cycloaddition Oligomerization of 1,6-Diynes to Medium-Size Cyclic Polyenes**

Yuhsaku Okabe, Takeshi Yamada and Sentaro Okamoto\*

Department of Materials and Life Chemistry, Kanagawa University, 3-27-1 Rokkakubashi, Kanagawa-ku, Yokohama  
221-8686, Japan

## S-1. Solvent effects

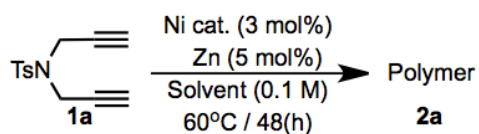

| entry | Solvent | yield | Polymer <sup>a</sup> |                      |      | entry | Solvent        | yield       | Polymer <sup>a</sup> |                      |      |
|-------|---------|-------|----------------------|----------------------|------|-------|----------------|-------------|----------------------|----------------------|------|
|       |         |       | <i>M<sub>n</sub></i> | <i>M<sub>w</sub></i> | PDI  |       |                |             | <i>M<sub>n</sub></i> | <i>M<sub>w</sub></i> | PDI  |
| 1     | THF     | 70%   | 1908                 | 2339                 | 1.23 | 4     | DMA            | 49%         | 1735                 | 2016                 | 1.16 |
| 2     | DMSO    | 38%   | 1837                 | 2144                 | 1.17 | 5     | NMP            | 59%         | 1852                 | 2230                 | 1.20 |
| 3     | Dioxane | 64%   | 1616                 | 1915                 | 1.18 | 6     | <i>t</i> -BuOH | No reaction |                      |                      |      |

## S-2. Results for the reaction of deuterated diyne **d<sub>2</sub>-1a**

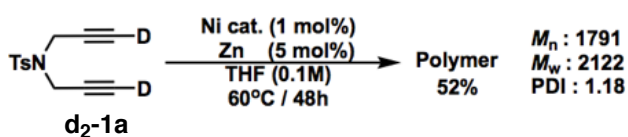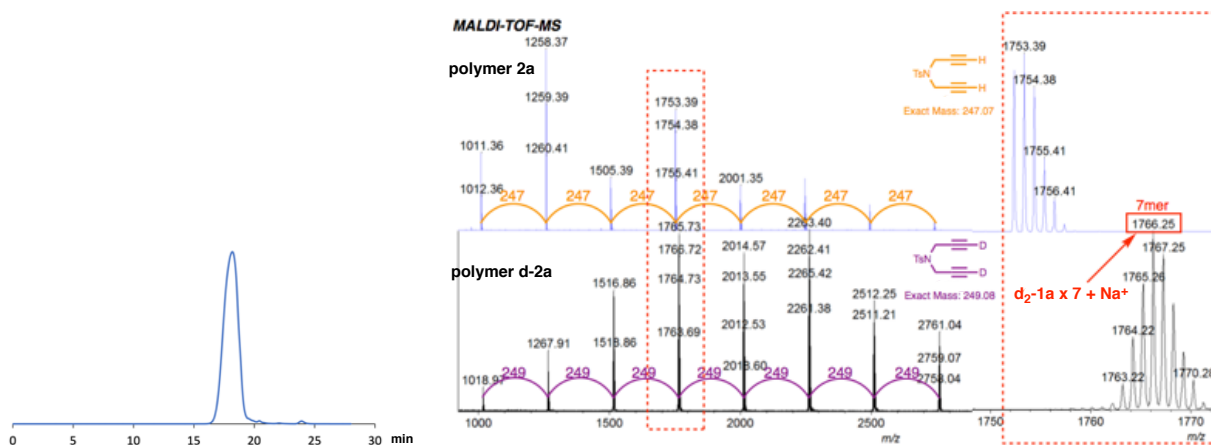

GPC profile

MALDI-TOF-MS spectra

<sup>1</sup>H NMR (CDCl<sub>3</sub>)

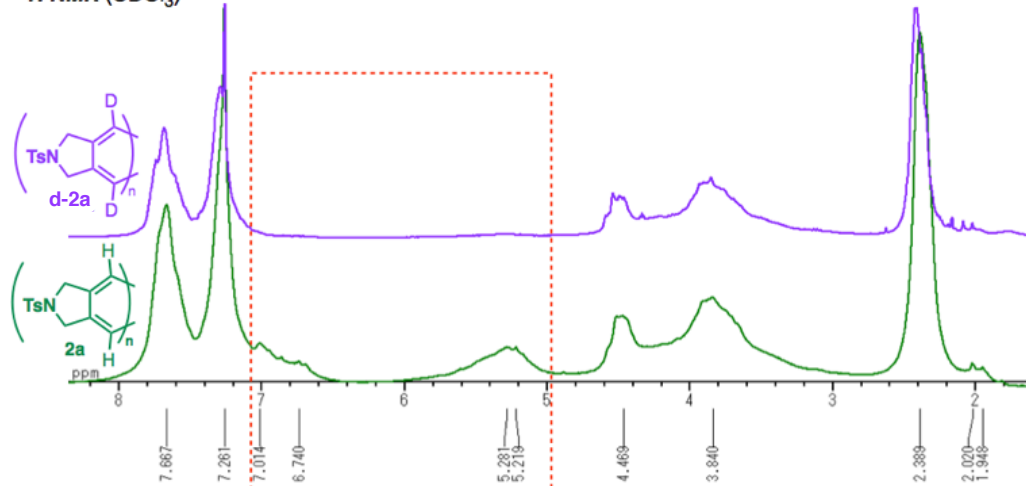

S-3 GPC profiles of crude polymers prepared by the reaction catalyzed by complex A

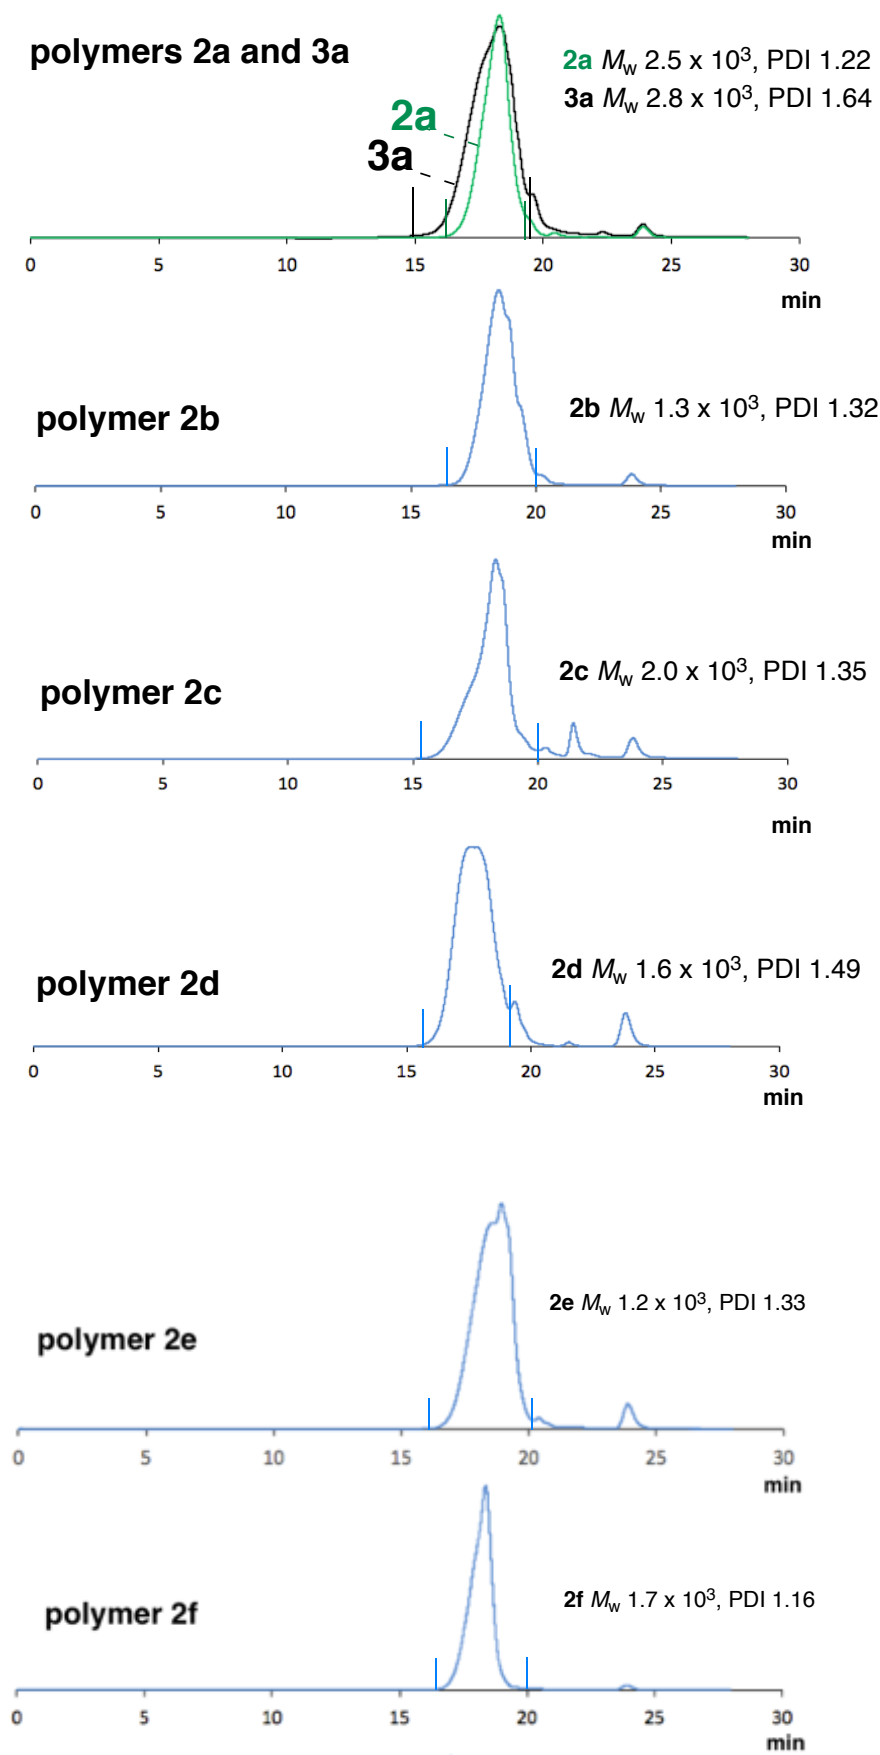

### S-4 GPC profiles of crude polymers derived from diyne 1a with various catalysts

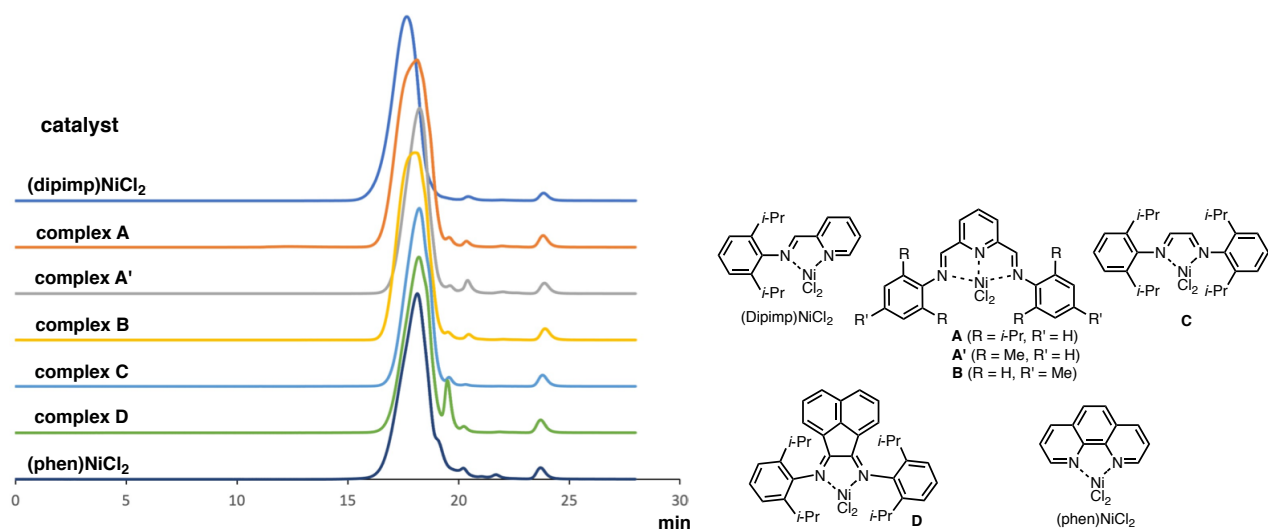

## Experimental Procedures

**General.** NMR spectra were recorded in deuterated chloroform ( $\text{CDCl}_3$ ) at 600, 500, and 400 MHz for  $^1\text{H}$  and 150, 125, and 100 MHz for  $^{13}\text{C}$  on JEOL JNM-ECA600, -ECA500, and -ECZ400 spectrometers, respectively. Chemical shifts are reported in parts per million (ppm,  $\delta$ ) relative to trimethylsilane ( $\text{Me}_4\text{Si}$ ,  $\delta$  0.00) or residual  $\text{CHCl}_3$  ( $\delta$  7.26 for  $^1\text{H}$  NMR), and  $\text{CDCl}_3$  ( $\delta$  77.0 for  $^{13}\text{C}$  NMR). MALDI-TOF mass spectra were recorded using a Shimadzu Biotech Axima CFRplus with curved field reflection (CFR) in reflection ion mode with a laser ( $\lambda = 337$  nm). IR spectra were recorded on a JASCO IR FT/IR 4100 spectrometer. UV-vis absorption spectra were recorded using Shimadzu UV-2450 spectrometers. Thermogravimetry/differential thermal analysis (TG/DTA) was carried out using Seiko Instruments Inc. EXSTAR6000 TG/DTA6200 under nitrogen (heating rate: 10  $^\circ\text{C}/\text{min}$ ). High-resolution mass spectroscopy (HR-MS) was performed on a JEOL Accu TOF T-100 instrument equipped with electrospray ionization (ESI) unit. The molecular weights ( $M_n$ ,  $M_w$ ) and polydispersities ( $M_w/M_n$ ) of the polymers were determined with a TOSOH HLC-8020 gel permeation chromatograph (GPC) unit [eluent: THF; calibration: polystyrene standards] using two TSK-gel columns (2  $\times$  Multipore H<sub>XL</sub>-M). All reactions sensitive to oxygen and/or moisture were performed under an argon atmosphere. Dry solvents [THF, *N,N*-dimethylformamide (DMF), dichloromethane ( $\text{CH}_2\text{Cl}_2$ ), toluene, *N*-methyl-2-pyrrolidone (NMP), and diethyl ether (ether)] were purchased from Kanto Chemicals. (Dipimp)NiCl<sub>2</sub>,<sup>1</sup> complexes **A**,<sup>2</sup> **B**,<sup>2</sup> **C**,<sup>3</sup> **D**,<sup>4</sup> and (phen)NiCl<sub>2</sub><sup>5</sup> were prepared by the reported procedures. Diynes **1a**,<sup>6</sup> **1b**,<sup>7</sup> **1c**,<sup>8</sup> **1d**,<sup>9</sup> **1e**,<sup>10</sup> **1f**,<sup>6</sup> and **1a-d**<sup>11</sup> were prepared according to the literature.

**4-(((*tert*-Butyldimethylsilyl)oxy)methyl)-*N,N*-di(prop-2-yn-1-yl)benzenesulfonamide (**1a'**).** To a mixture of 4-(hydroxymethyl)-*N,N*-di(prop-2-yn-1-yl)benzenesulfonamide<sup>12</sup> (0.810 g, 3.08 mmol) and imidazole (0.462 g, 6.78 mmol) in DMF (15 mL) was added *t*-BuMe<sub>2</sub>SiCl (0.556 g, 3.70 mmol) and the mixture was stirred for 12 h at room temperature. After the addition of water, the mixture was extracted with Et<sub>2</sub>O. The combined organic layers were washed with brine, dried over MgSO<sub>4</sub>, filtered, and concentrated. The residue was purified by recrystallization in hexane to provide **1a'** (1.09 g) in 94% yield.  $^1\text{H}$  NMR (400 MHz,  $\text{CDCl}_3$ )  $\delta$  7.69 (d,  $J = 8.8$  Hz, 2H, Ar), 7.35 (d,  $J = 8.8$  Hz, 2H, Ar), 4.69 (s, 2H, OCH<sub>2</sub>), 4.07 (d,  $J = 2.0$  Hz, 4H, NCH<sub>2</sub>), 2.03 (t,  $J = 2.0$  Hz, 2H, CH), 0.84 (s, 9H, *t*Bu), -0.01 (s, 6H, SiCH<sub>3</sub>);  $^{13}\text{C}$  NMR (100 MHz,  $\text{CDCl}_3$ )  $\delta$  147.3, 136.4, 127.9, 126.1, 76.1, 64.2, 36.2, 25.9, 18.4, -5.3; IR (ATR) 3279, 2953, 2927, 2884, 2857, 2120, 1600, 1471, 1409, 1361, 1342, 1322, 1254, 1210, 1154, 1124, 1091, 1017, 955, 890, 834, 775  $\text{cm}^{-1}$ . HR-MS (ESI<sup>+</sup>) for C<sub>19</sub>H<sub>27</sub>NO<sub>3</sub>SSiNa: Calcd. 400.1373, Found 400.1392.

**General procedure for nickel-catalyzed cycloaddition cyclooligomerization of 1,6-diyne.** Under argon atmosphere, to a stirred mixture of Zn powder (3.3 mg, 0.05 mmol) and diyne **1** (1.0 mmol) in THF (4 mL) was added a solution of complex **A** (6.0 mg, 0.01 mmol) in THF (6 mL) at 60  $^\circ\text{C}$ . After stirring for 48 h at this temperature, the mixture was allowed to cool to ambient temperature and 4 mL of Et<sub>2</sub>O was added. The resulting mixture was passed through a pad

of Celite and the filtrate was concentrated under reduced pressure. The residue was chromatographed on silica gel to obtain cyclic polyene **2**.

Polymer **2a** (317 mg) was obtained in 78% yield from **1a** (247 mg, 1.00 mmol).

Polymer **2b** (108 mg) was obtained in 55% yield from **1b** (197 mg, 1.00 mmol).

Polymer **2c** (105 mg) was obtained in 41% yield from **1c** (255 mg, 1.00 mmol).

Polymer **2d** (143 mg) was obtained in 74% yield from **1d** (193 mg, 1.00 mmol).

Polymer **2e** (71 mg) was obtained in 37% yield from **1e** (191 mg, 1.00 mmol).

Polymer **2f** (175 mg) was obtained in 78% yield from **1f** (292 mg, 1.00 mmol).

**Copolymerization of 1a and 1a'**. Under argon atmosphere, to a stirred mixture of Zn powder (9.8 mg, 0.03 mmol) and diyne **1a** (649 mg 2.625 mmol) and **1a'** (93 mg, 0.375 mmol) in THF (12 mL) was added a solution of complex **A** (18.0 mg, 0.03 mmol) in THF (18 mL) at 60 °C. After stirring for 48 h at this temperature, the mixture was allowed to cool to ambient temperature and 15 mL of Et<sub>2</sub>O was added. The resulting mixture was passed through a pad of Celite and the filtrate was concentrated under reduced pressure. The corresponding COT **4a** and benzene derivatives were removed from the crude residue by chromatography on silica gel to obtain a mixture of polyene **2** and **2a'-OTBS** (total 412 mg) in ~56% yield.

**Desilylation of 2a'-OTBS and isolation of 2a'-OH**. To a solution of **2a'-OTBS** (412 mg, approximately 1.67 mmol) in THF (5 mL) was added *n*-Bu<sub>4</sub>NF (3.3 mL, 1.0 M in THF, 3.3 mmol) at room temperature. After being stirred for 12 h, water was added. The mixture was extracted with AcOEt (15 mL), dried over Na<sub>2</sub>SO<sub>4</sub>, filtered, and concentrated under reduced pressure. The residue was chromatographed on silica gel (hexane/AcOEt) to give **2a** (105 mg) and **2a'-OH** (126 mg) in 14% yield and ~17% yield (based on **1a** and **1a'** (total 3.0 mmol)), respectively.

## Catalysts

Nickel complexes, (dipimp)NiCl<sub>2</sub>, complex **A**,<sup>13</sup> complex **B**,<sup>14,15</sup> complex **C**,<sup>14,15</sup> complex **D**,<sup>16</sup> and (phen)NiCl<sub>2</sub><sup>17</sup> were prepared according to the reported procedure.

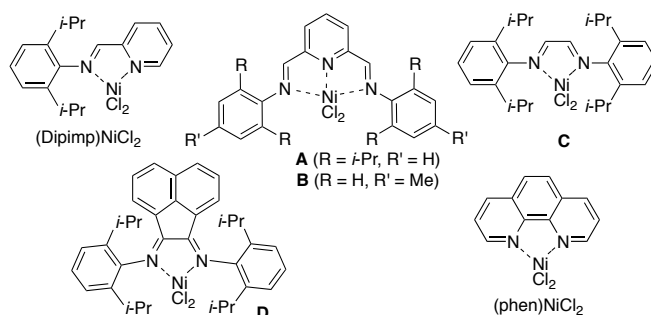

## References

- [1] Mogheiseh, M.; Zohuri, G. H.; Khoshsefat, M. *J. Appl. Polym. Sci.*, 2019, 47376.
- [2] Reed, B. R.; Stoian, S. A.; Lord, R. L.; Groysman, R. S. *Chem. Commun.*, 2015, **51**, 6496–6499.
- [3] Wang, H.; Liu, C.-F.; Martin, R. T.; Gutierrez, O.; Koh, M. J. *Nat. Chem.*, **2022**, *14*, 188–195.
- [4] Khrizanforova, V. V.; Fayzullin, R. R.; Morozov, V. I.; Glimutdinov, I. F.; Lukoyanov, A. N.; Kataeva, O. N.; Gerasimova, T. P.; Katsyuba, S. A.; Fedushkin, I. L.; Lyssenko, K. A.; Budnikova, Y. H. *Chem. Asian J.*, **2019**, *14*, 2979–2987.
- [5] Nami, S. A. A.; Siddiqi, K. S. *J. Chem. Res.*, **2006**, 563–565.
- [6] Gläsel, T.; Jiao, H.; Hapke, M. *ACS Catal.*, **2021**, *11*, 13434–13444.
- [7] Hashmi, A. S.; Molinari, L.; Rominger, F.; Oeser, T. *Eur. J. Org. Chem.*, **2011**, 2256–2264.
- [8] Sarmiento-Sánchez, J. I.; Ochoa-Terán, A.; Rivero, I. A. *Sci. World J.*, **2014**, 264762/8, 8pp.
- [9] Bonomi, P.; Attieh, M. D.; Gonzato, C.; Haupt, K. *Chem. Eur. J.*, **2016**, *22*, 10150–10154.
- [10] Kang, E.-H.; Kang, C.; Yang, S.; Oks, E.; Choi, T.-L. *Macromolecules*, **2016**, *49*, 6240–6250.
- [11] Kanada, J.; Yamashita, K.; Nune, S. K.; Tanaka, M. *Tetrahedron Lett.*, **2009**, *50*, 6196–6199.
- [12] Wu, P.; Feldman, A. K.; Nugent, A. K.; Hawker, C. J.; Brigitte Voit, A. S.; Pyun, J.; Fréchet, J. M. J.; Sharpless, K. B.; Fokin, V. V. *Angew. Chem. Int. Ed.*, **2004**, *43*, 3928–3932.
- [13] Tsaulwayo, N.; Kumah, R. T.; Ojwach, J. *Mol. Structure*, **2021**, *1232*, 129987.
- [14] Reed, B. R.; Stoian, S. A.; Lord, R. L.; Groysma, S. *Chem. Commun.*, **2015**, *51*, 6496–6499.
- [15] Reed, B. R.; Yousif, M.; Lord, R. L.; McKinnon, M.; Rochford, J.; Groysman, S. *Organometallics*, **2017**, *36*, 582–593.
- [16] De Souza, C. G.; de Souza, R. F.; Bernardo-Gusmão, K. *Appl. Catal. A: General*, **2007**, *325*, 87–90.
- [17] Khrizanforova, V. V.; Fayzullin, R. R.; Morozov, V. I.; Glimutdinov, I. F.; Lukoyanov, A. N.; Kataeva, O. N.; Gerasimova, T. P.; Katsyuba, S. A.; Fedushkin, I. L.; Lyssenko, K. A.; Bundnikova, Y. H. *Chem An Asian J.*, **2019**, *14*, 2979–2987.

## Spectroscopic Data

### NMR Spectra

#### Diyne monomer 1a

Diyne monomer 1a (1H NMR)

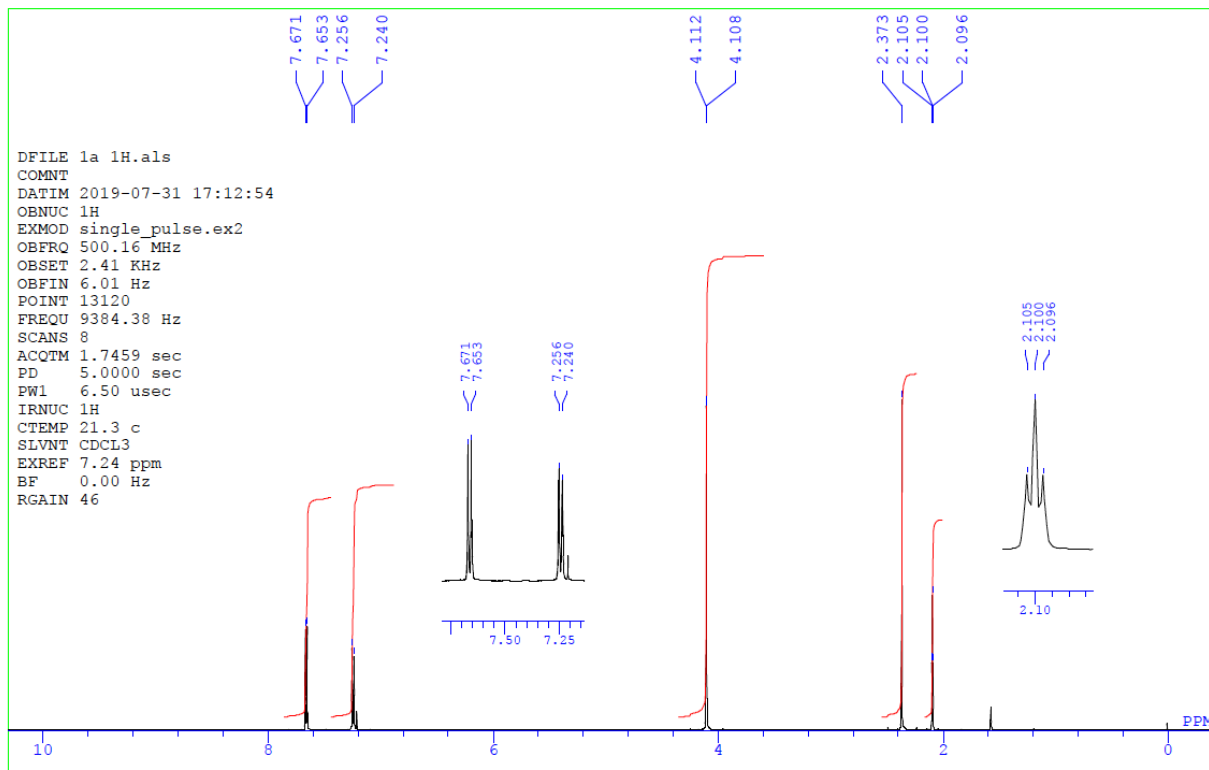

Diyne monomer 1a (13C NMR)

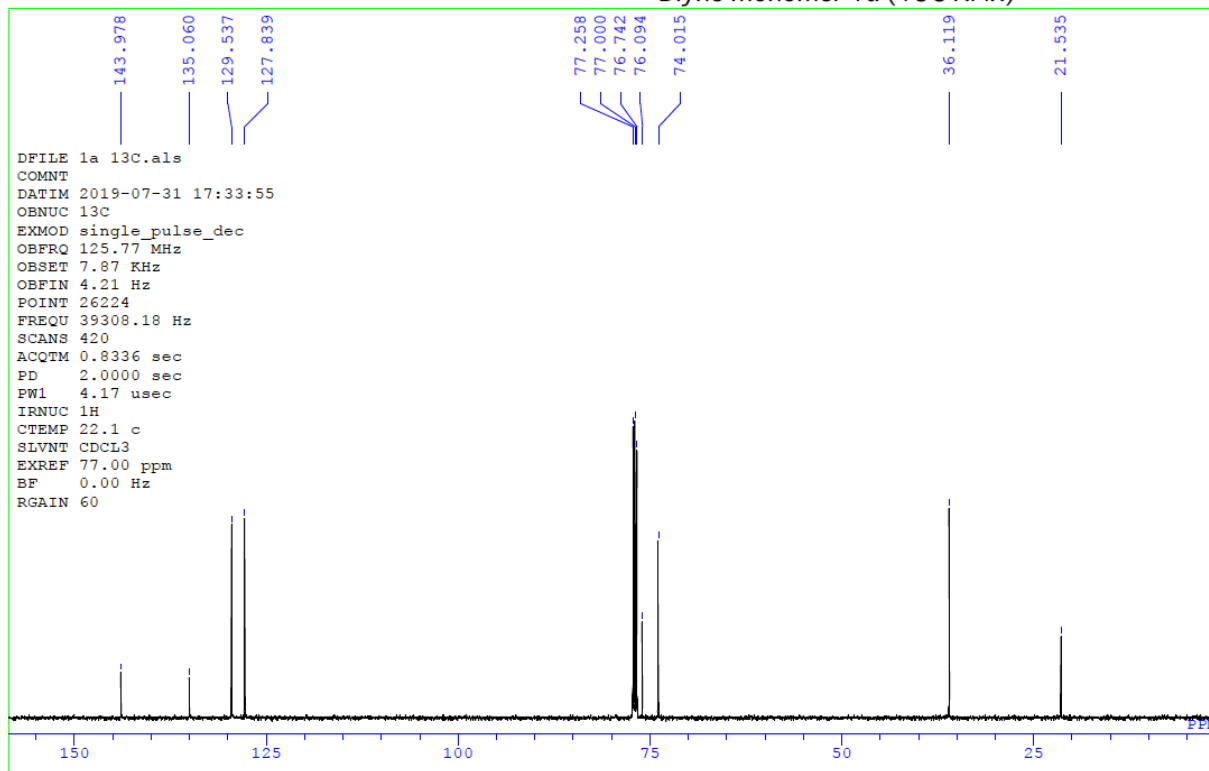



# Diyne monomer 1a'

## Diyne monomer 1a' (1H NMR)

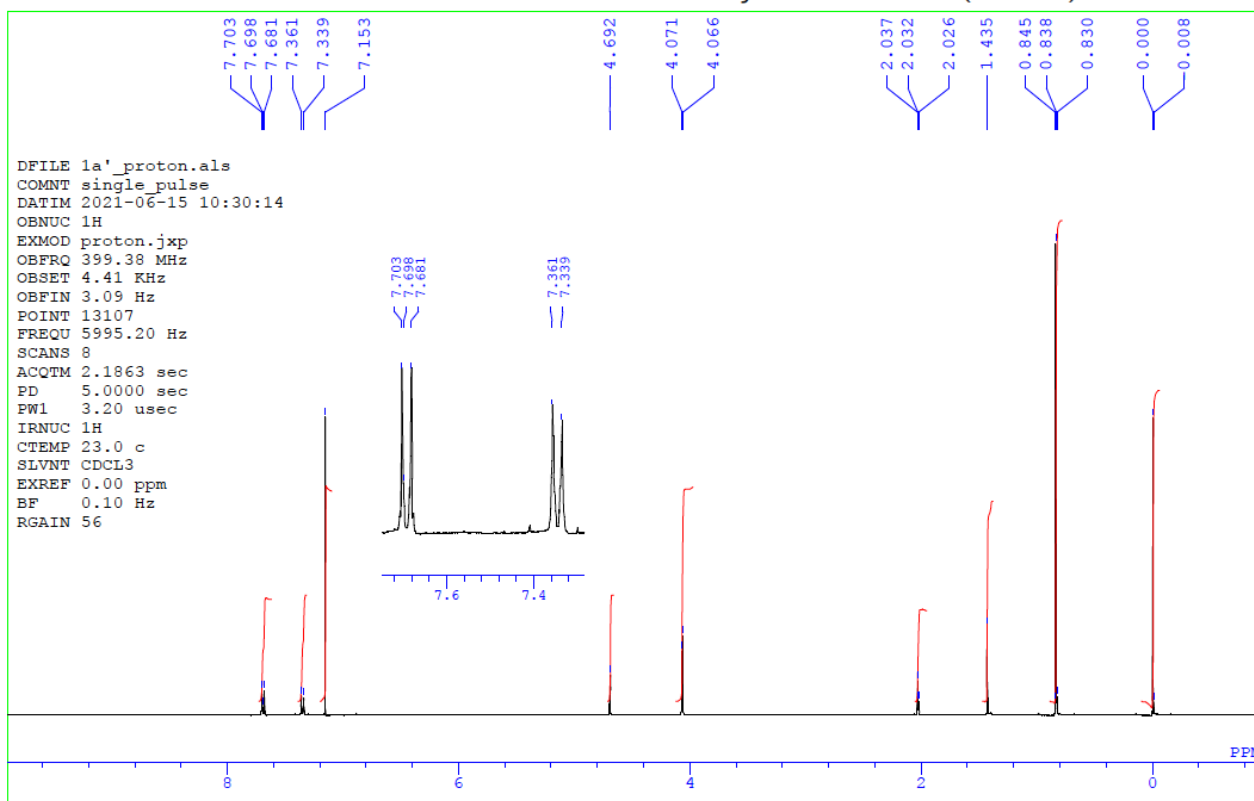

## Diyne monomer 1a' (13C NMR)

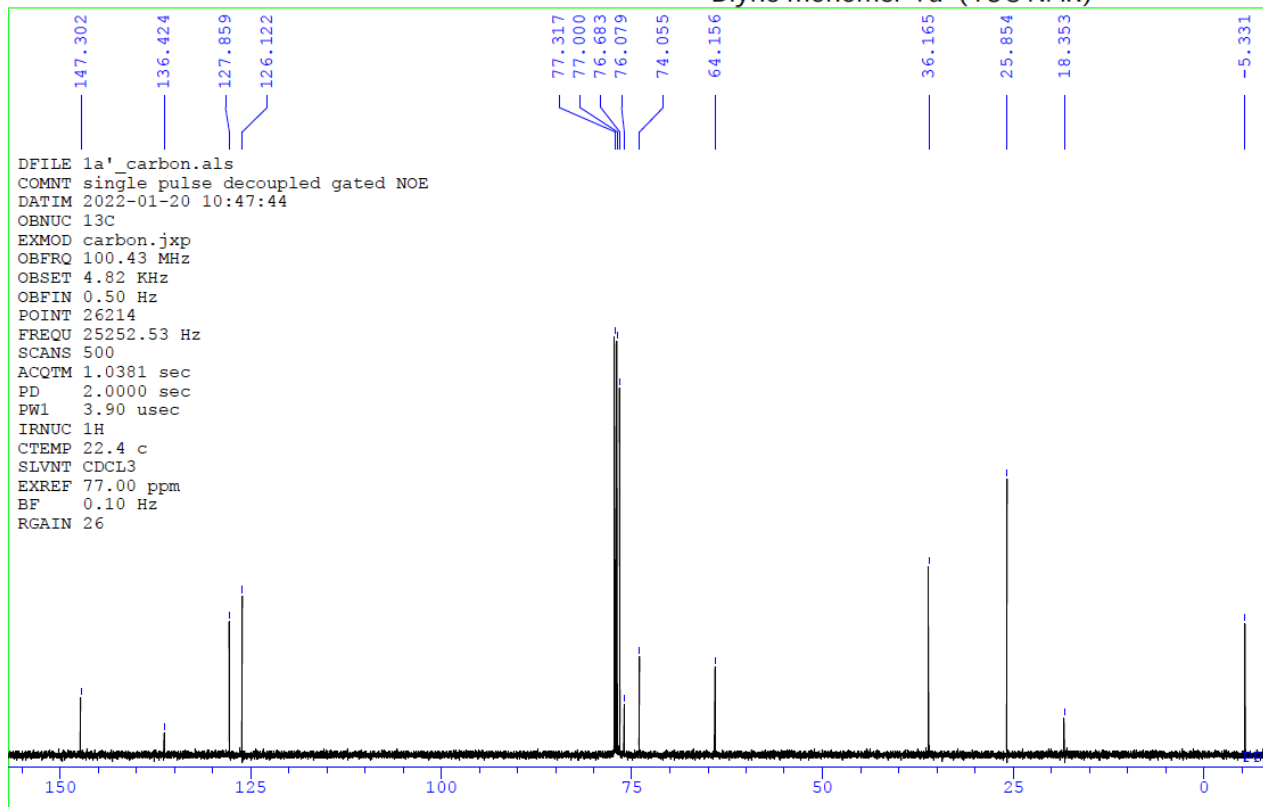

## Diyne monomer 1a-d<sub>2</sub>

### Diyne monomer 1a-d<sub>2</sub> (1H NMR)

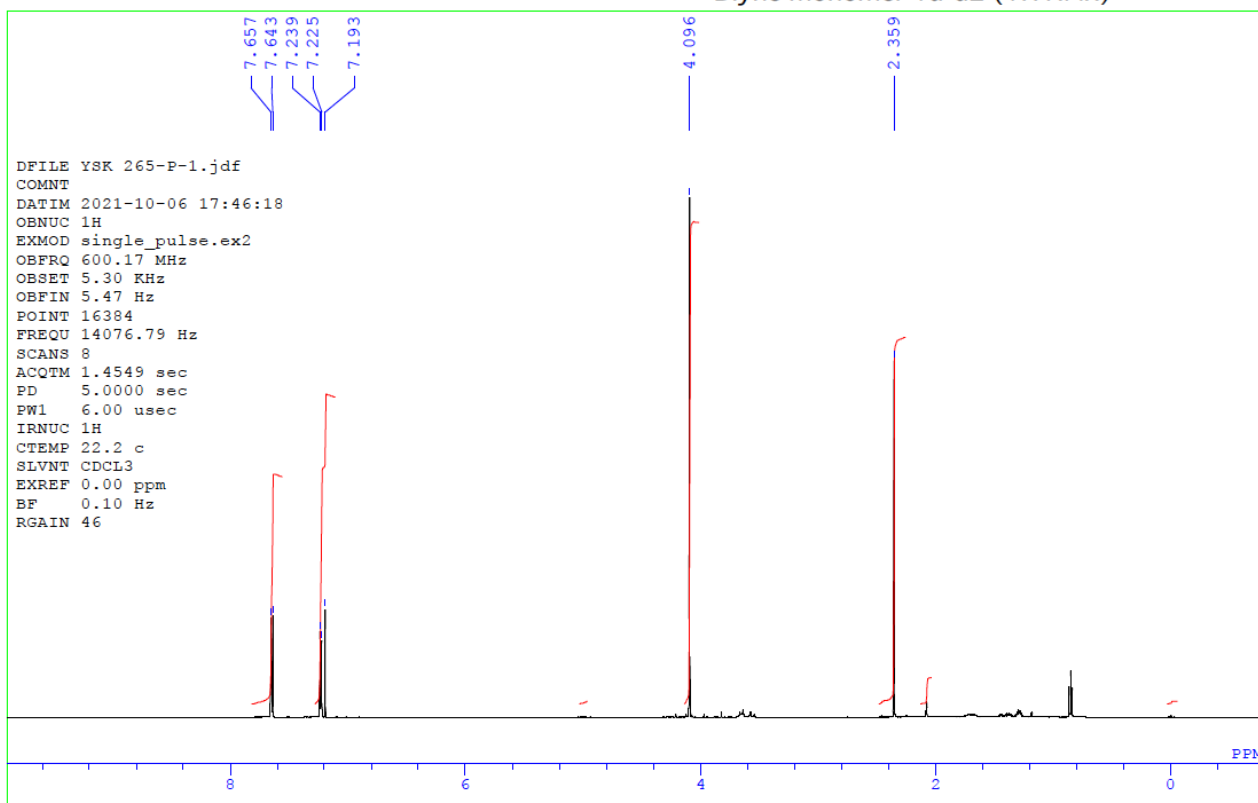

## Diyne monomer 1b

### Diyne monomer 1b (1H NMR)

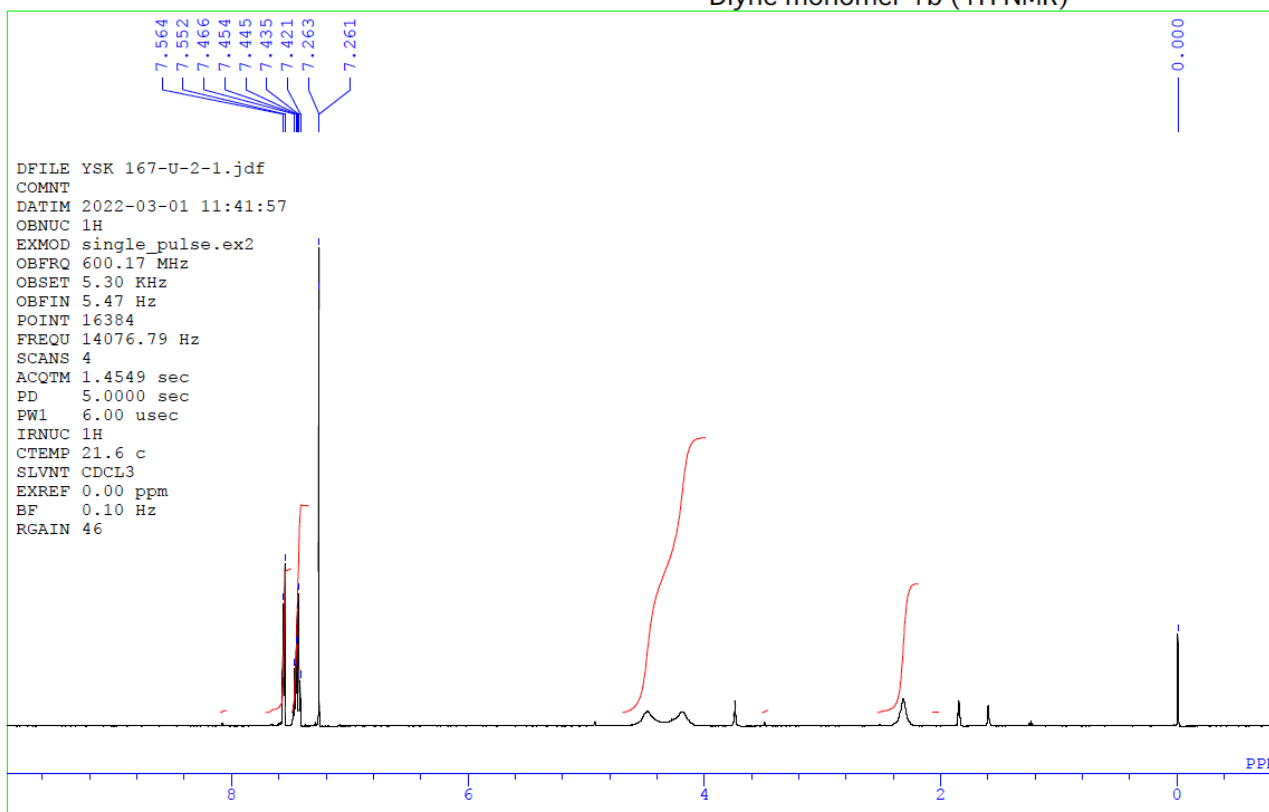

## Diyne monomer 1c

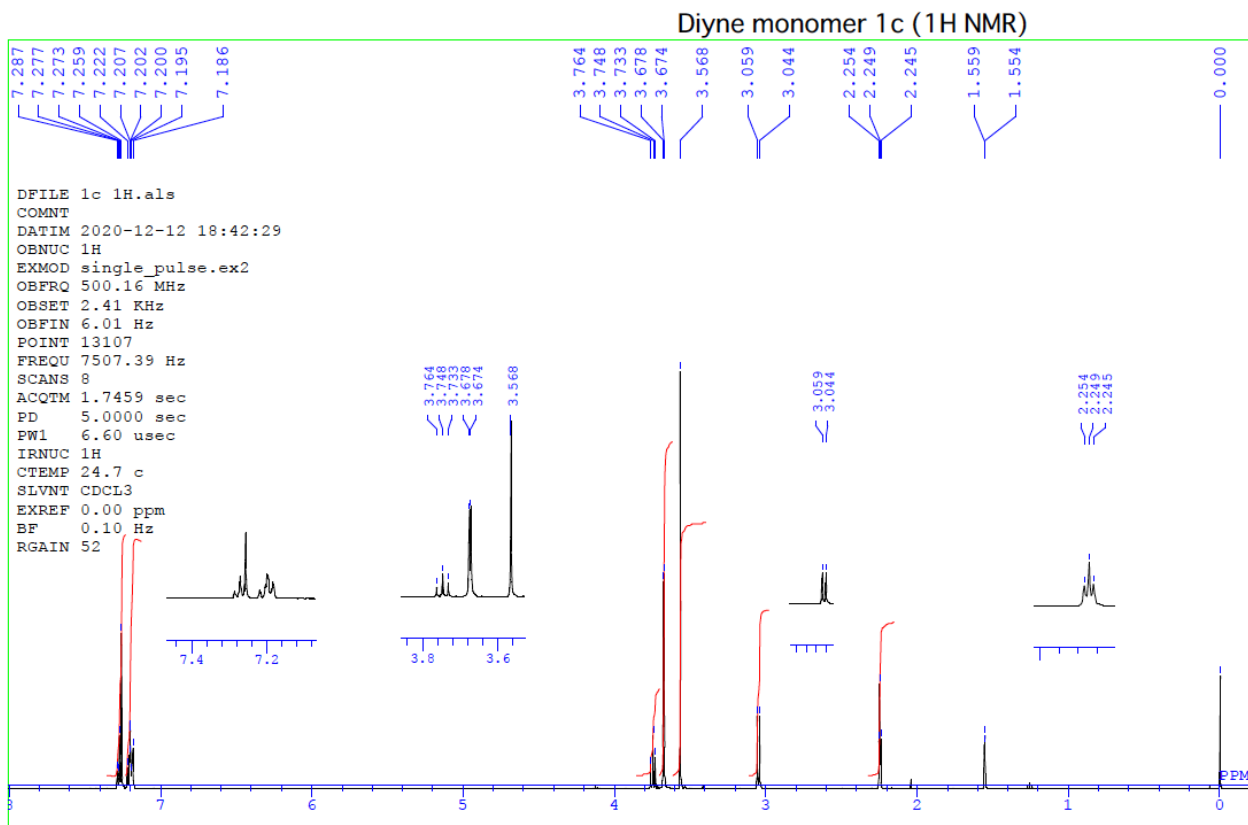

## Diyne monomer 1d

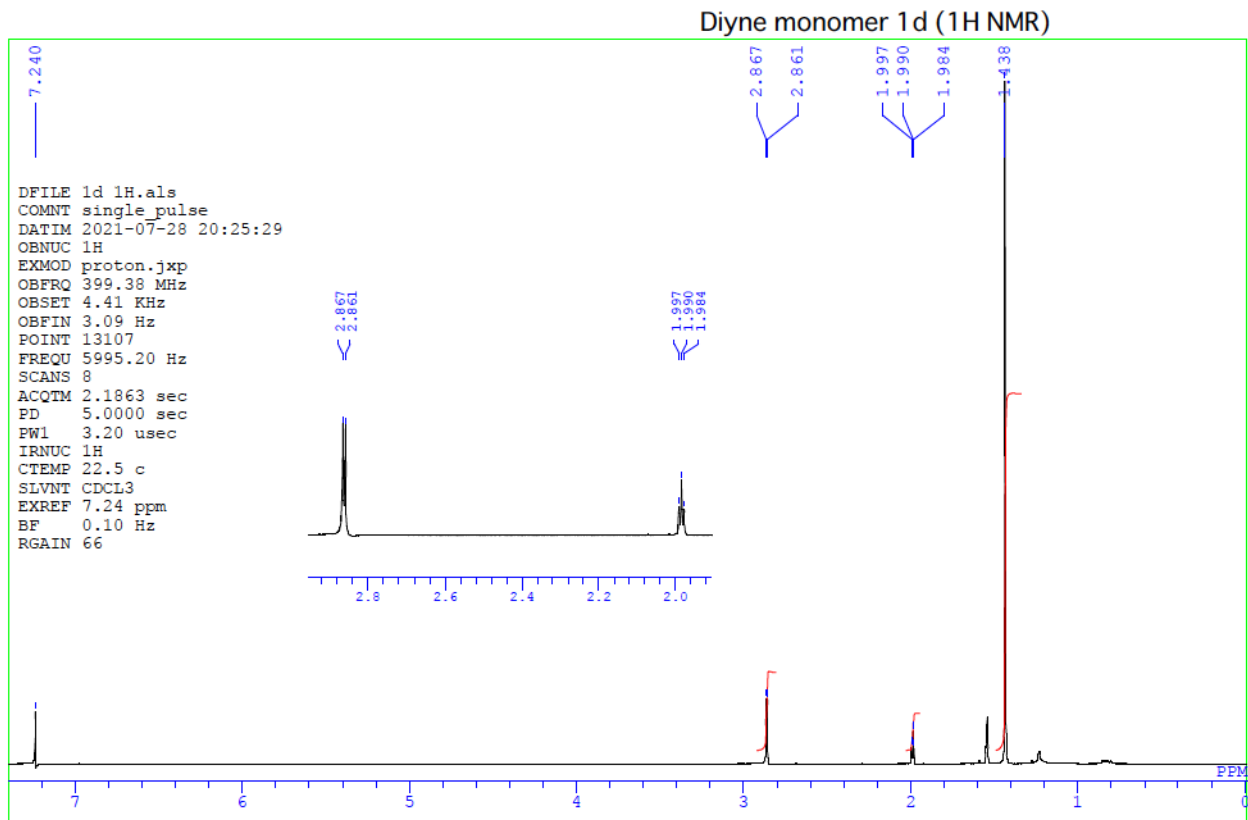

## Diyne monomer 1e

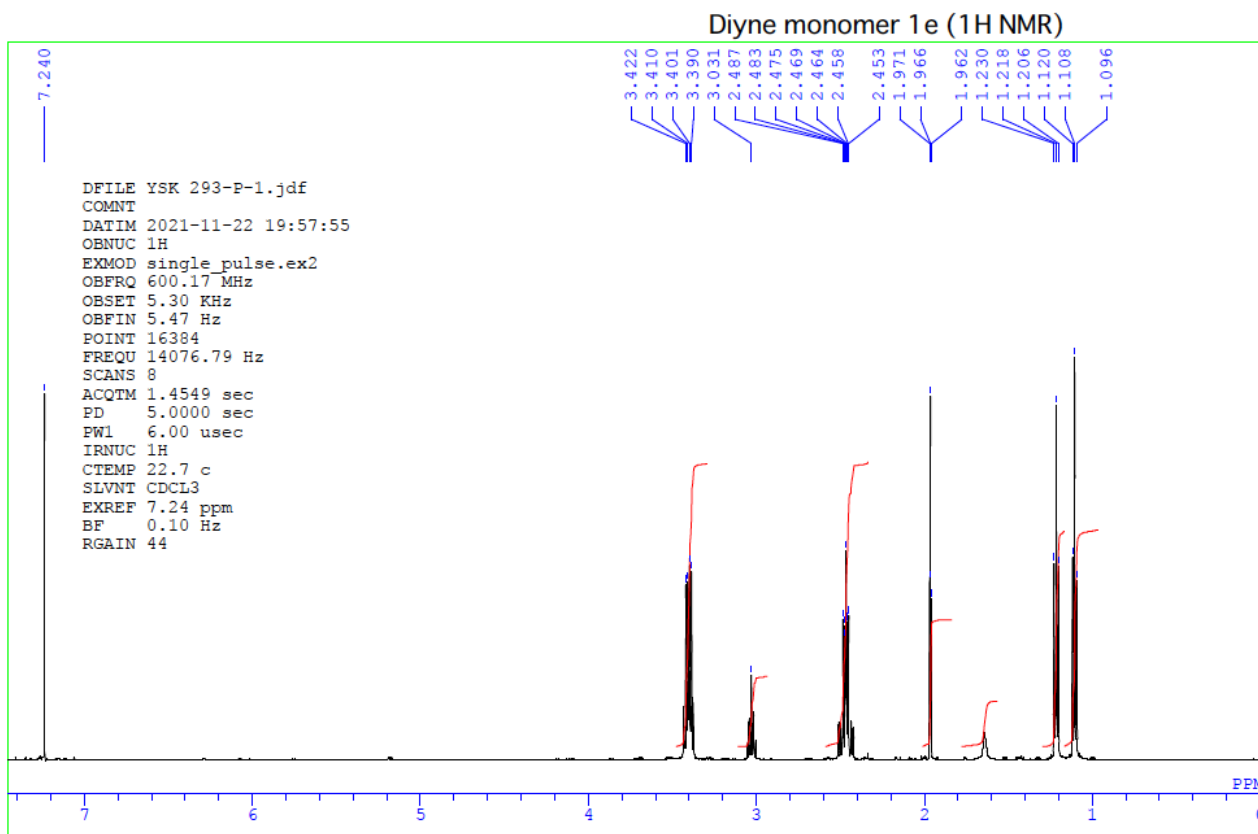

## Diyne monomer 1f

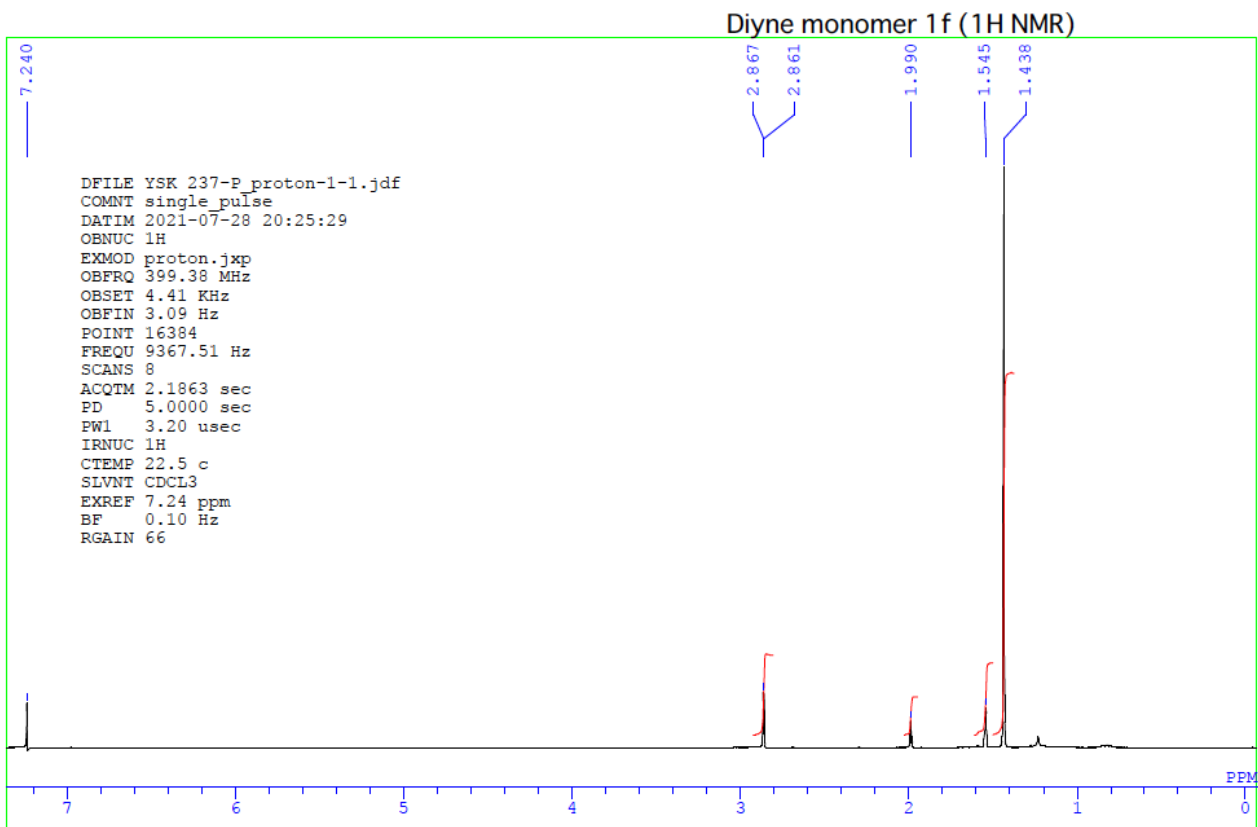

# Polymer 2a

## Polymer 2a (1H NMR)

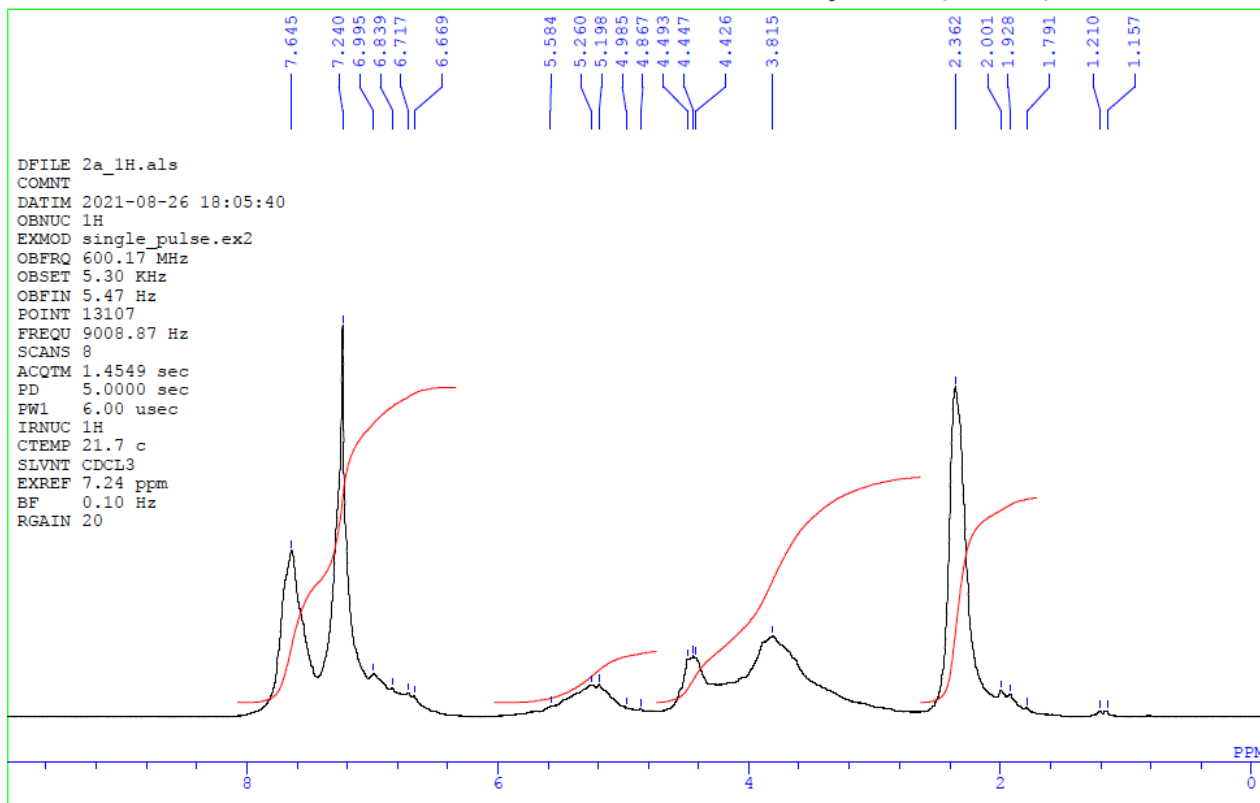

## Polymer 2a (13C NMR)

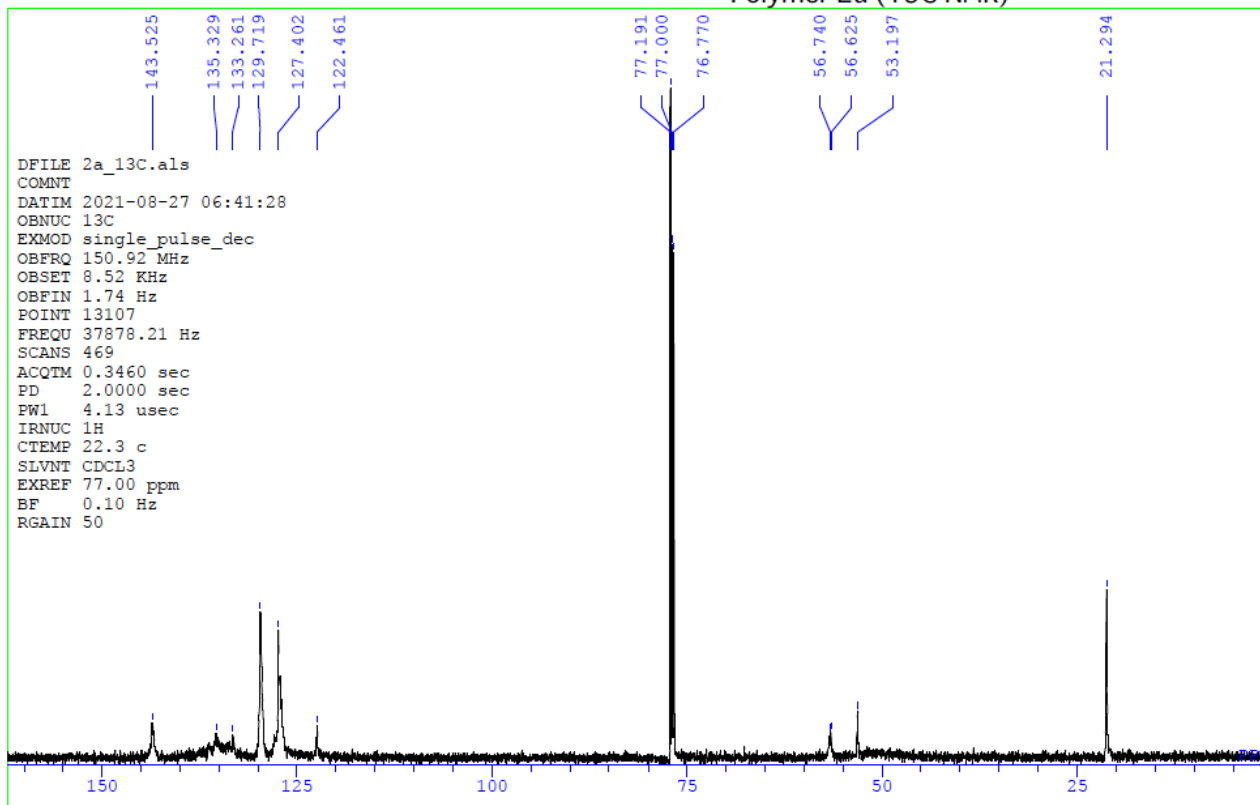

# Polymer 2a-d<sub>2</sub>

## Polymer 2a-d<sub>2</sub> (1H NMR)

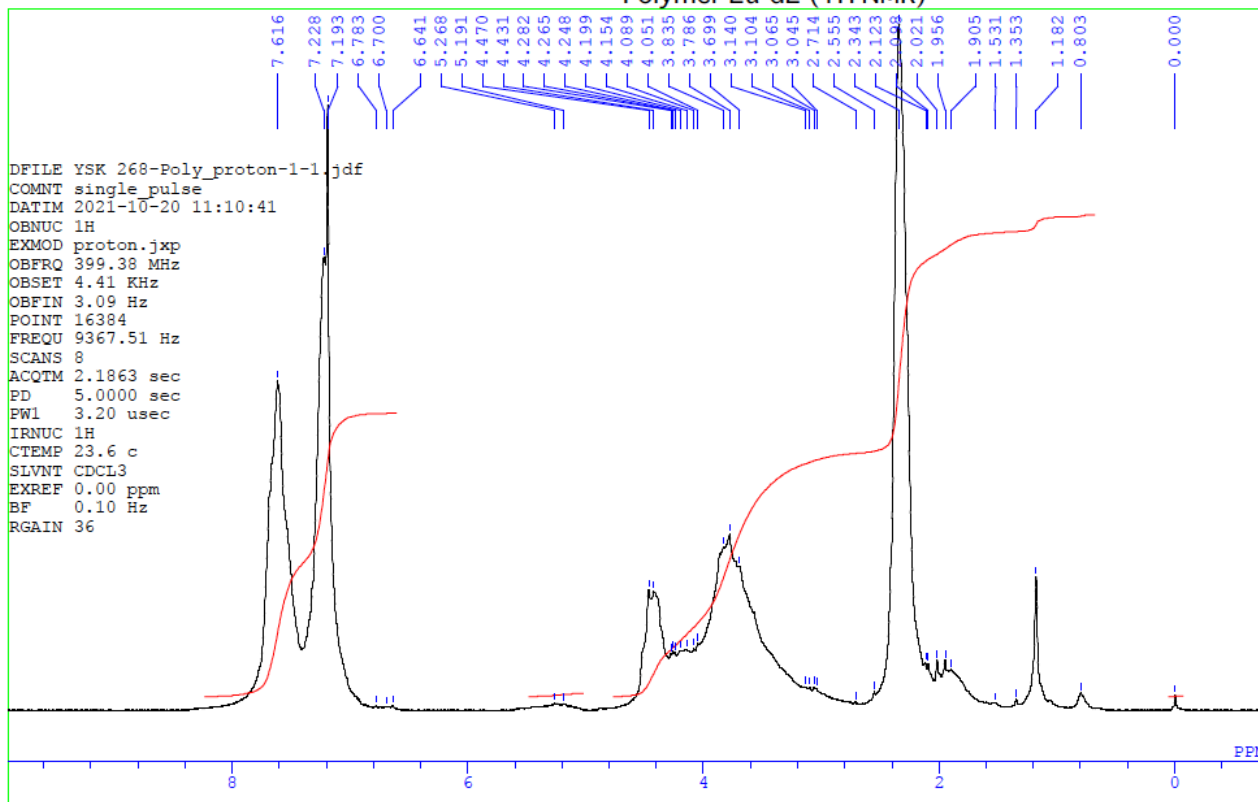

## Polymer 2a-d<sub>2</sub> (13C NMR)

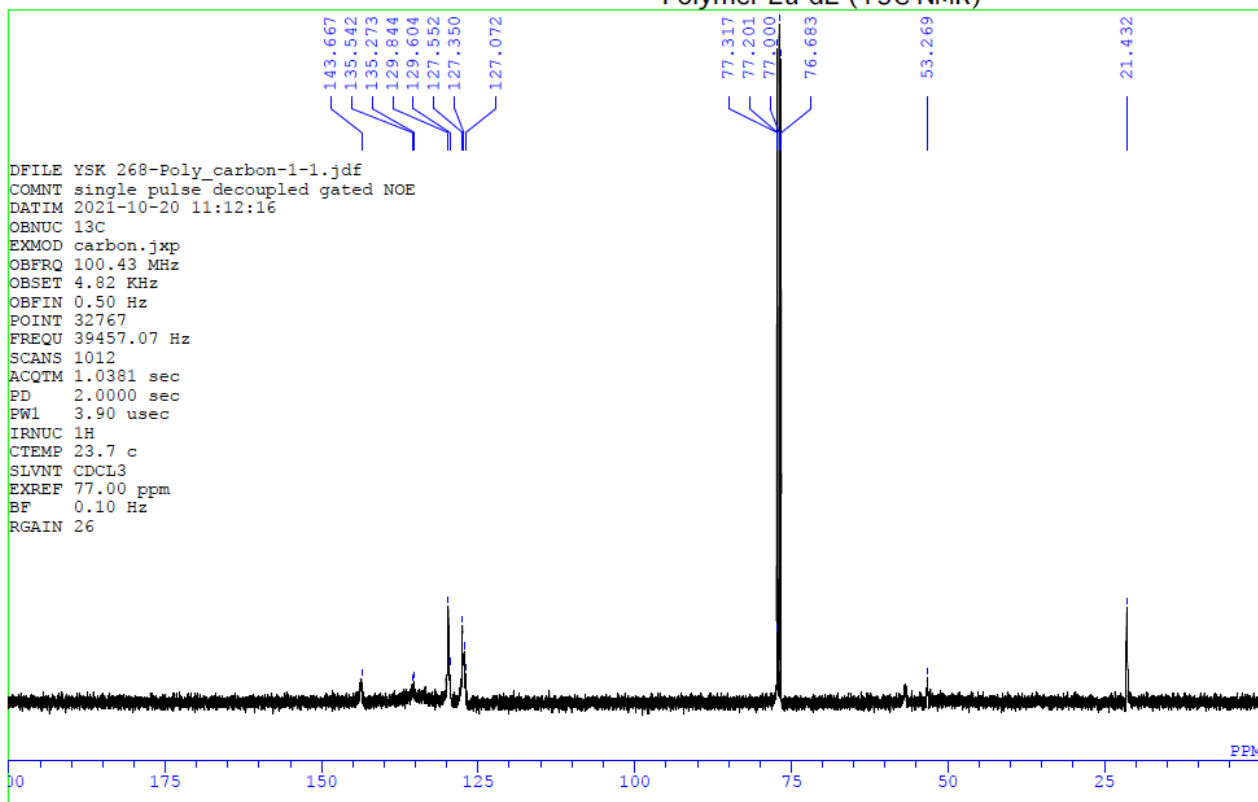

# Polymer 2a'-OH

## Polymer 2a'-OH (isolated) (1H NMR)

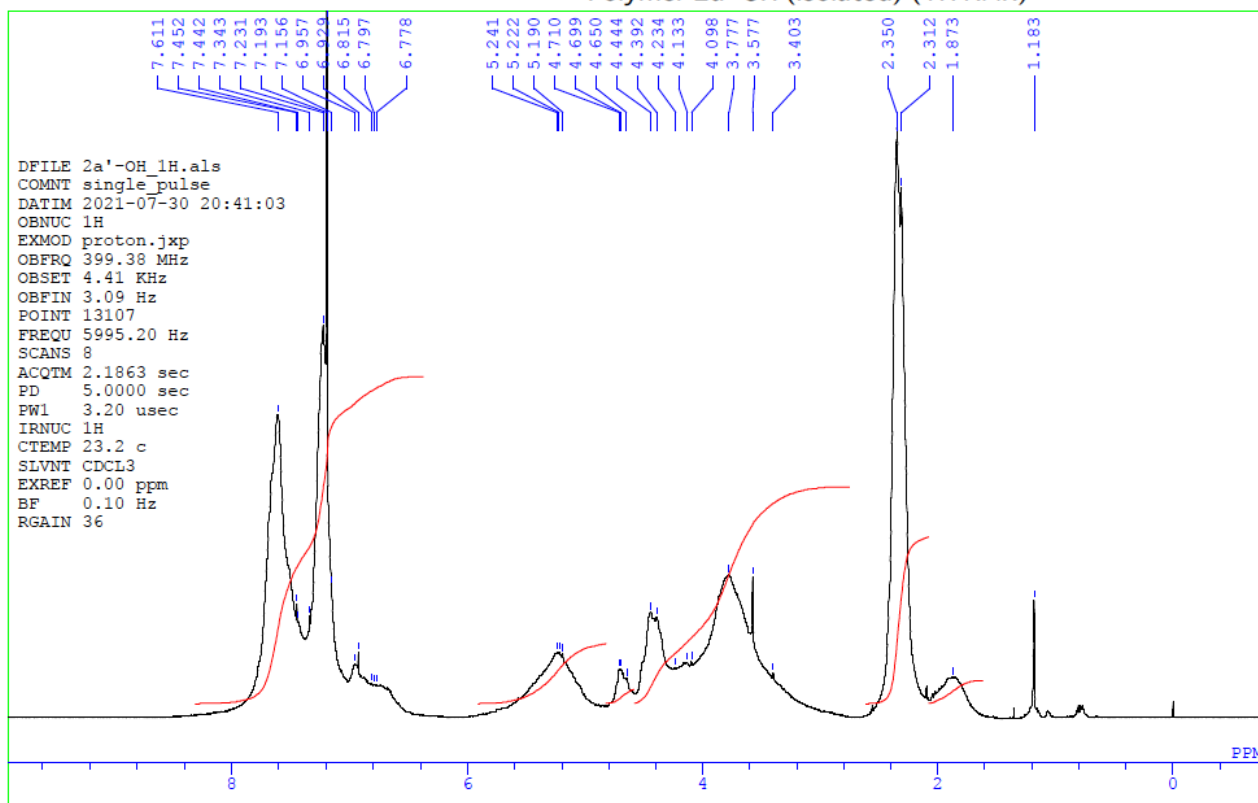

## Polymer 2a'-OH (isolated) (13C NMR)

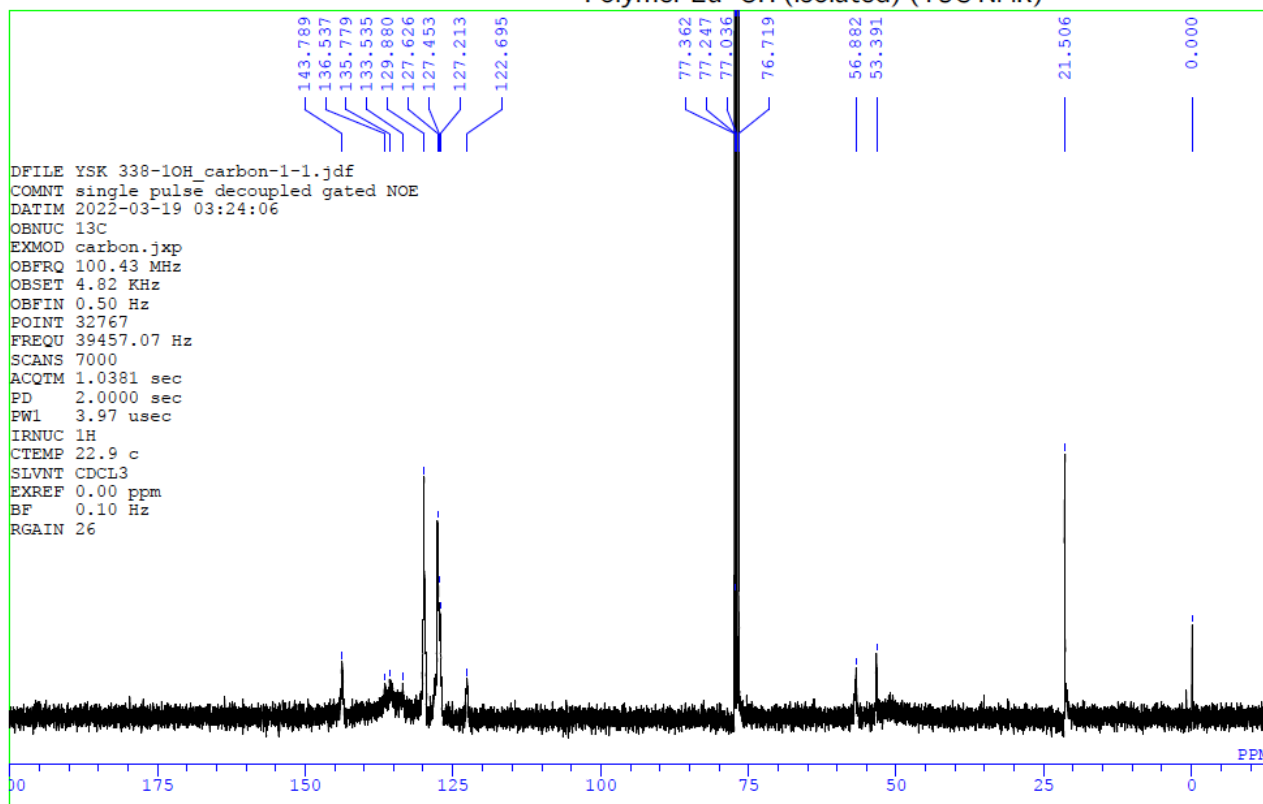

# Polymer 2a'-OTBS

## Polymer 2a'-OTBS (a mixture of homopolymer and copolymers) (1H NMR)

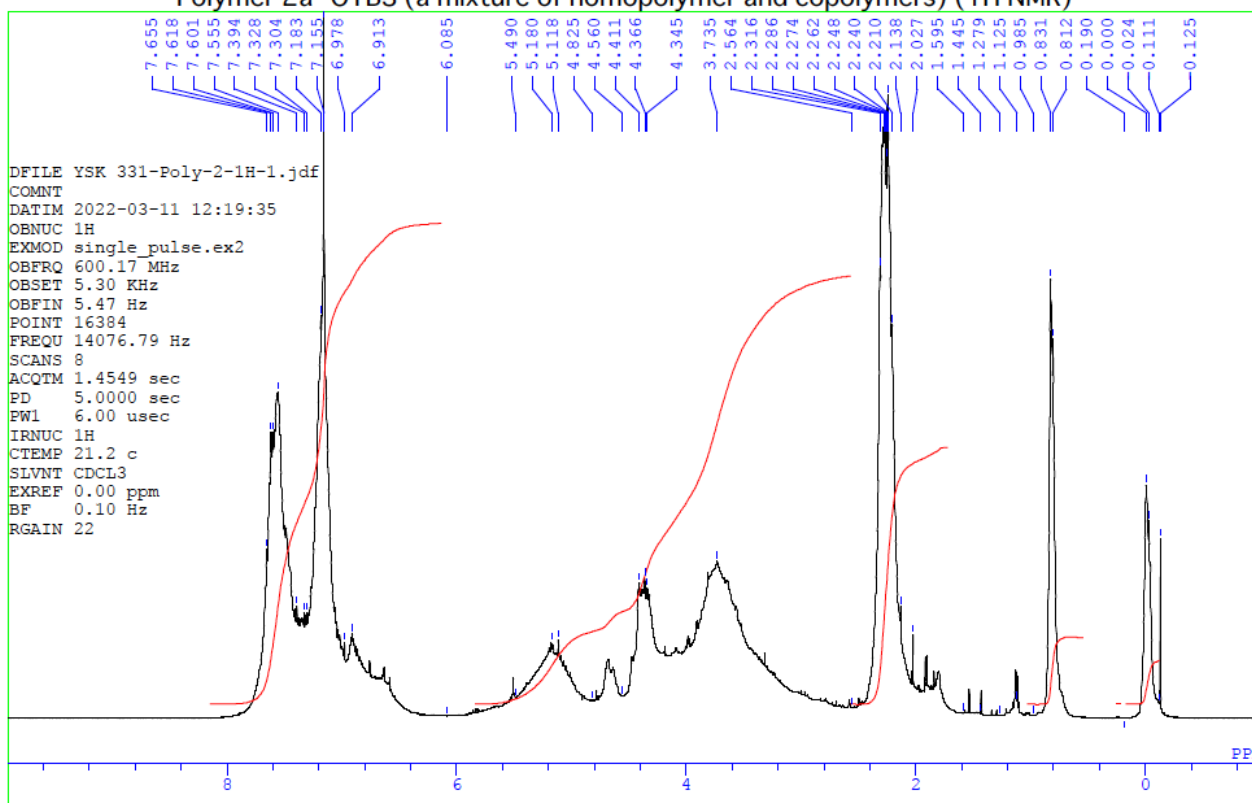

## Polymer 2a'-OTBS (a mixture of homopolymer and copolymers) (13C NMR)

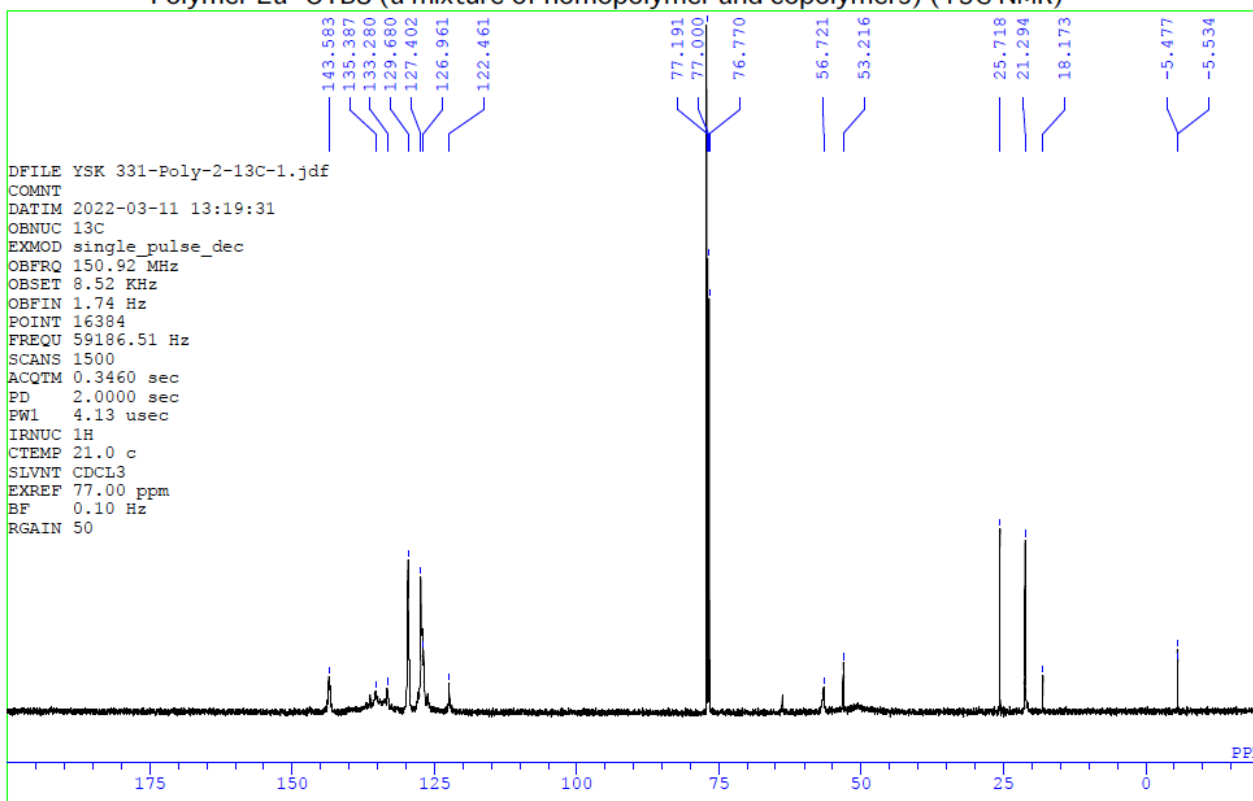



# Polymer 2b

## Polymer 2b (1H NMR)

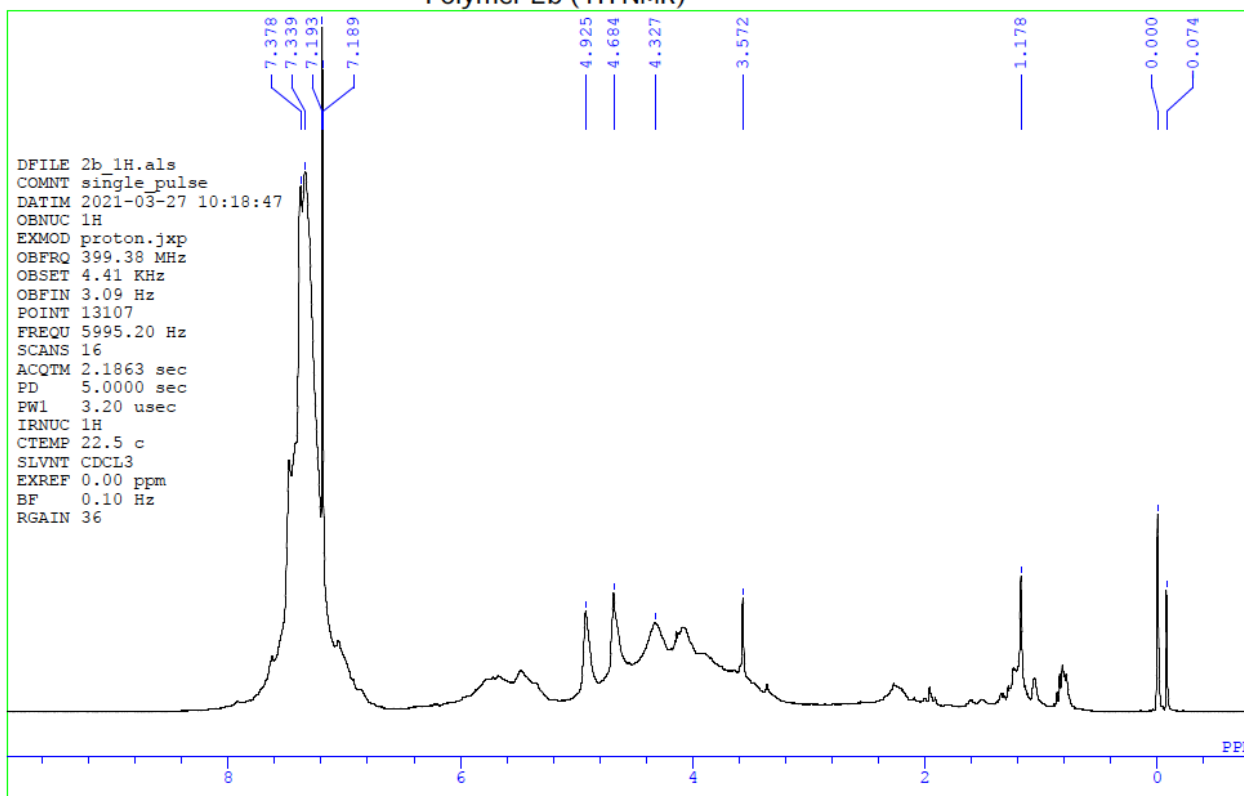

## Polymer 2b (13C NMR)

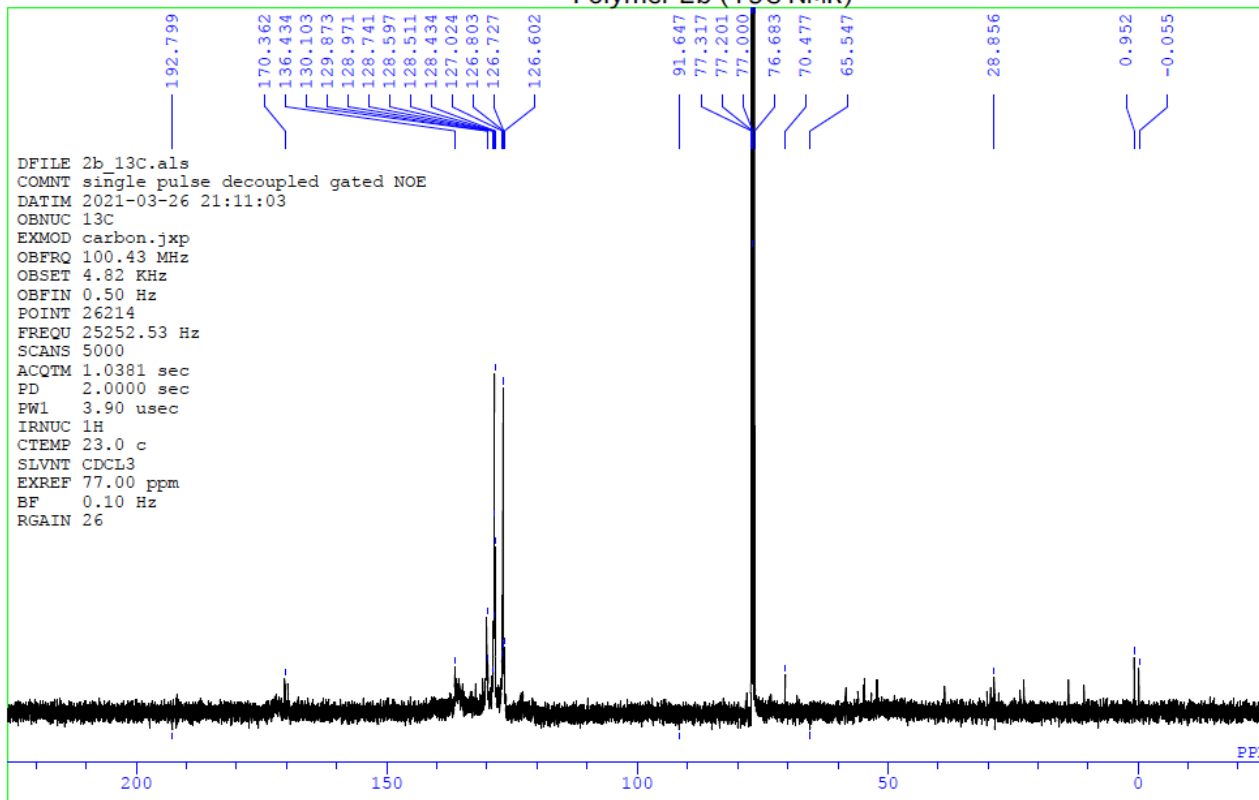

# Polymer 2c

## Polymer 2c (1H NMR)

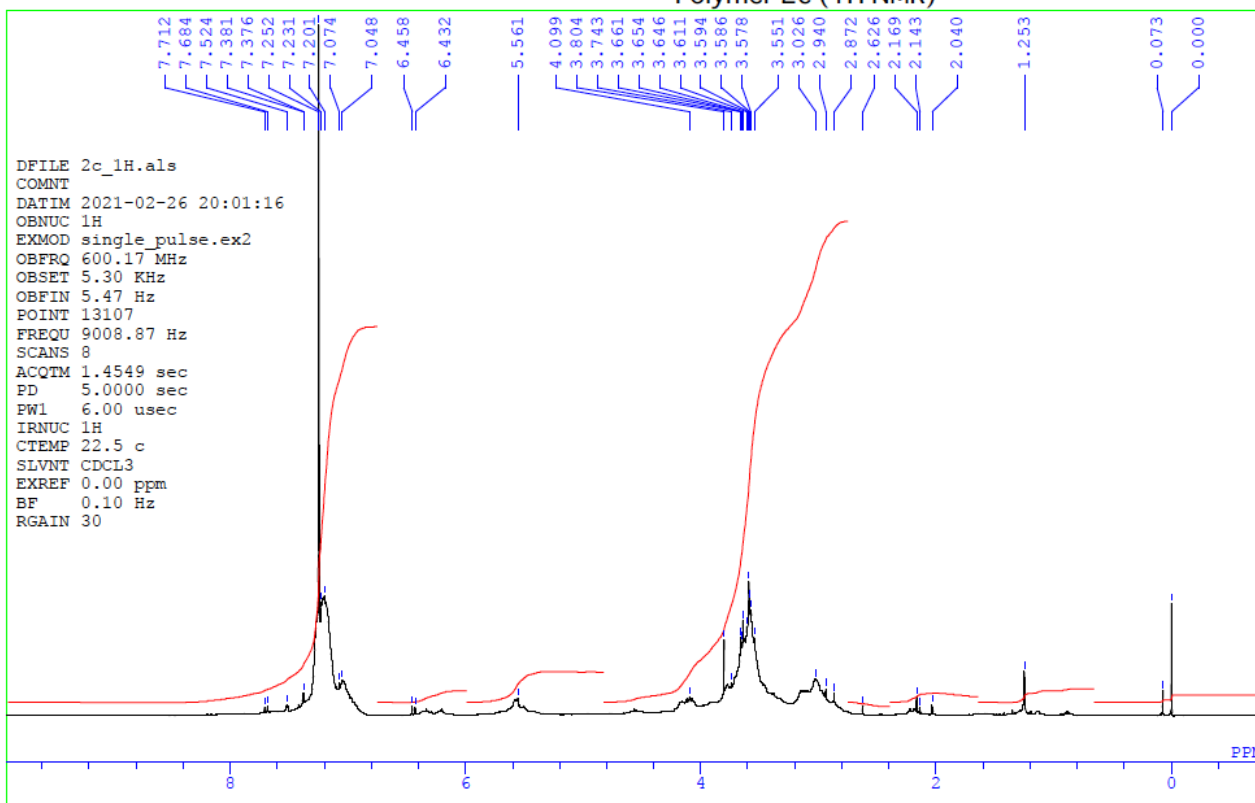

## Polymer 2c (13C NMR)

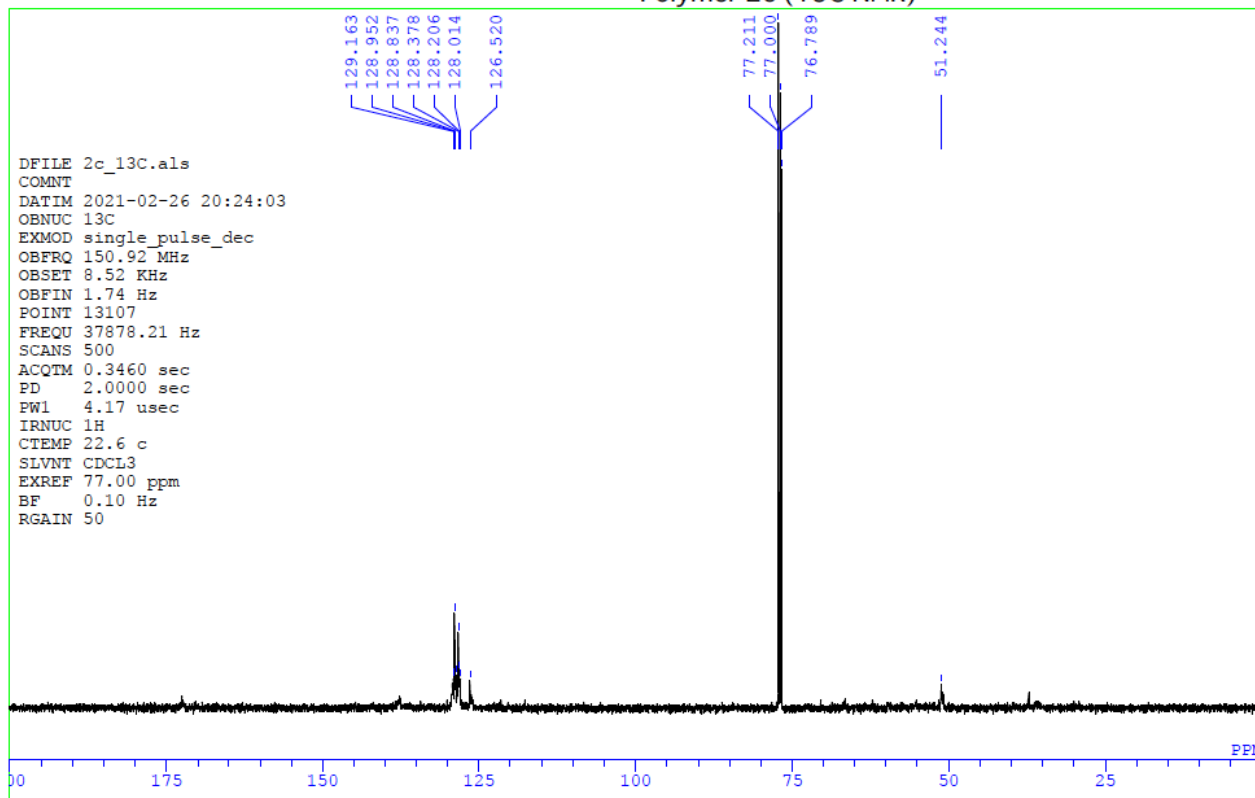

## Polymer 2d

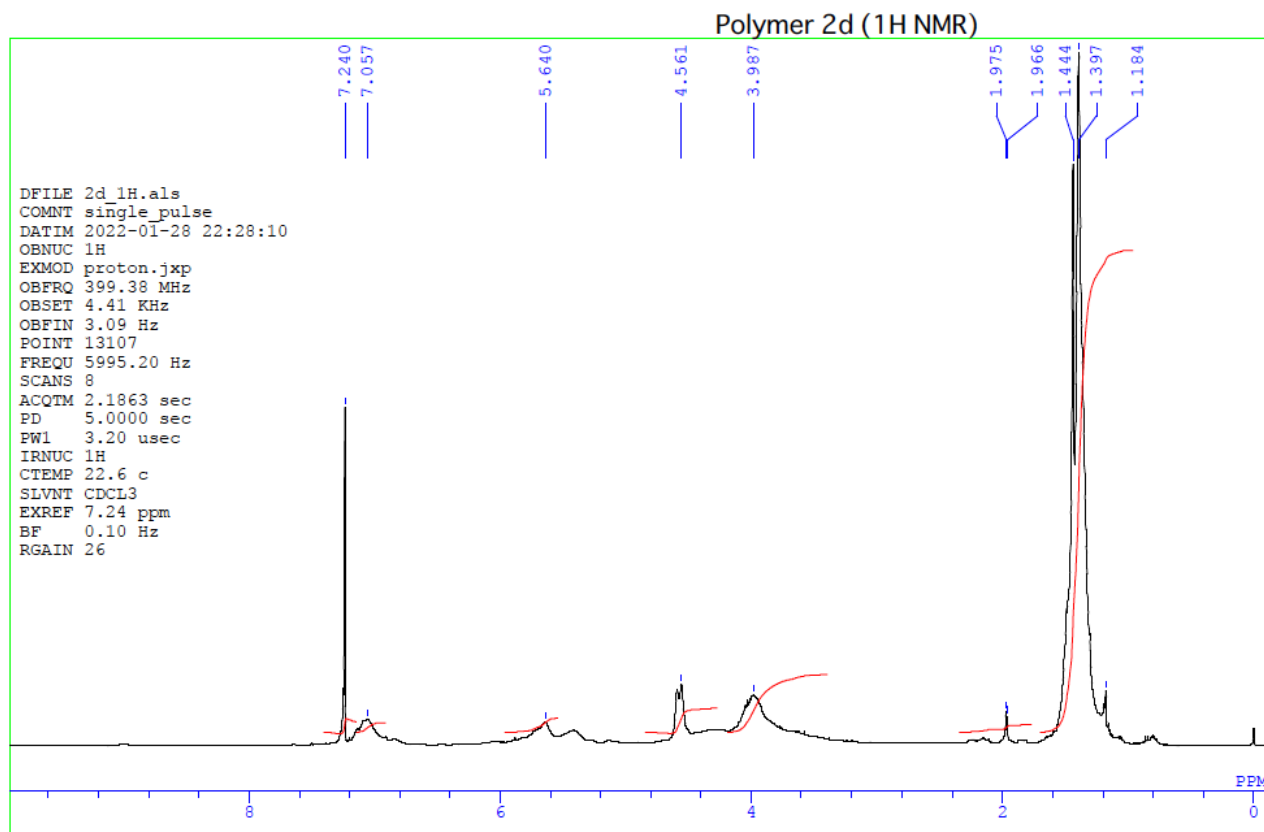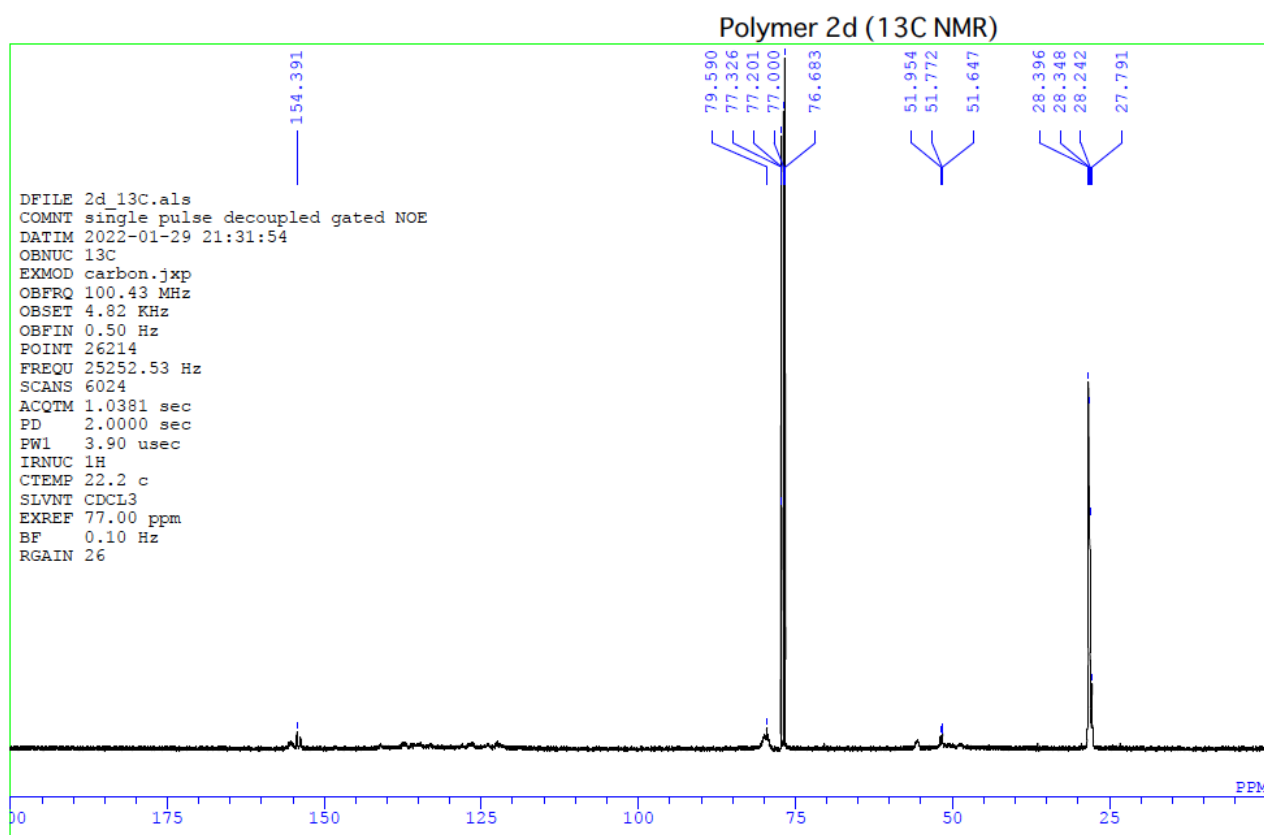

# Polymer 2e

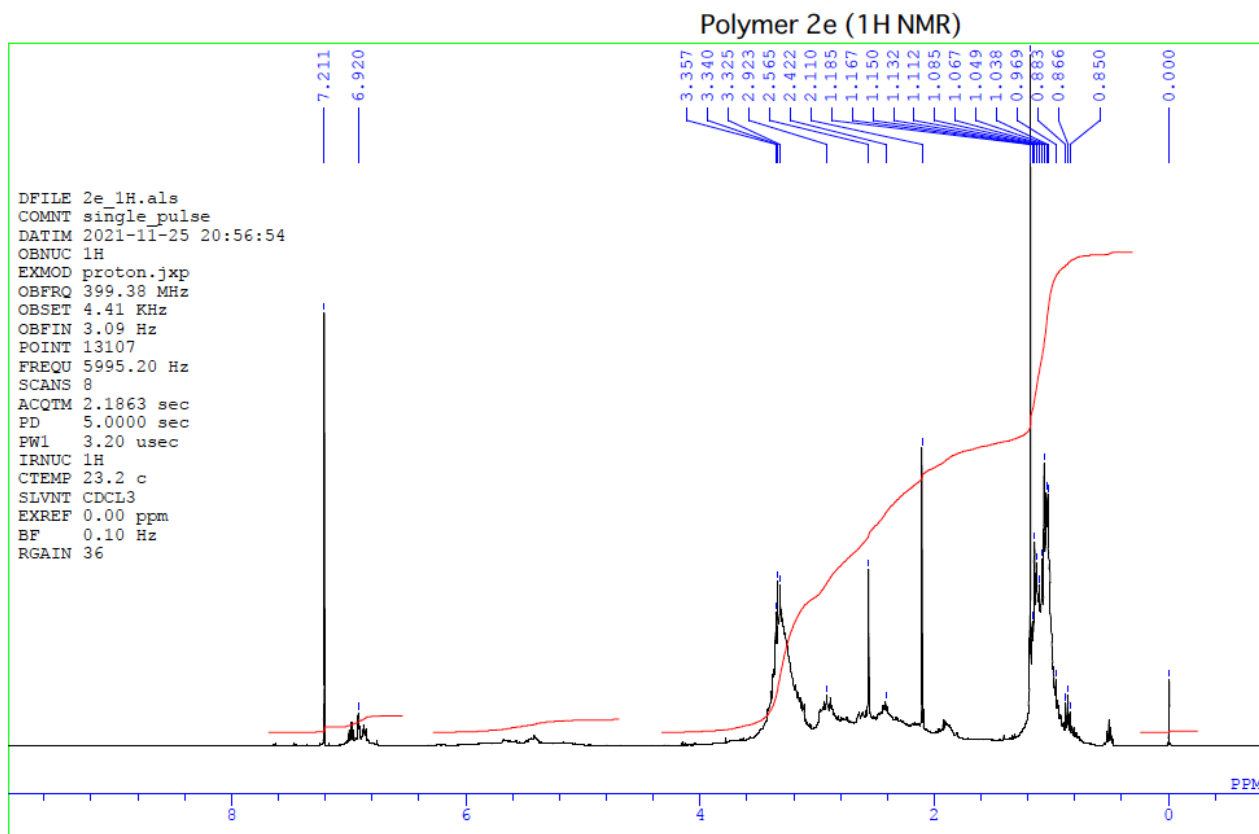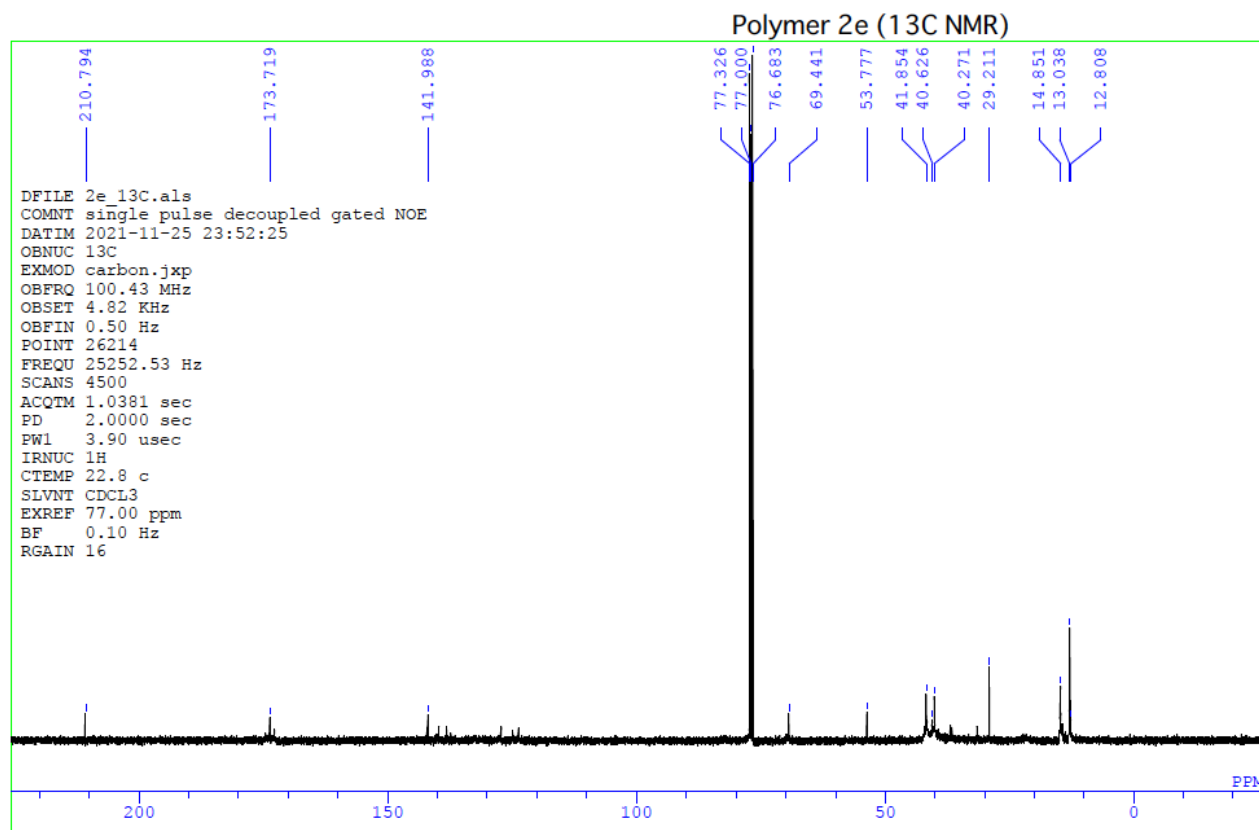

# Polymer 2f

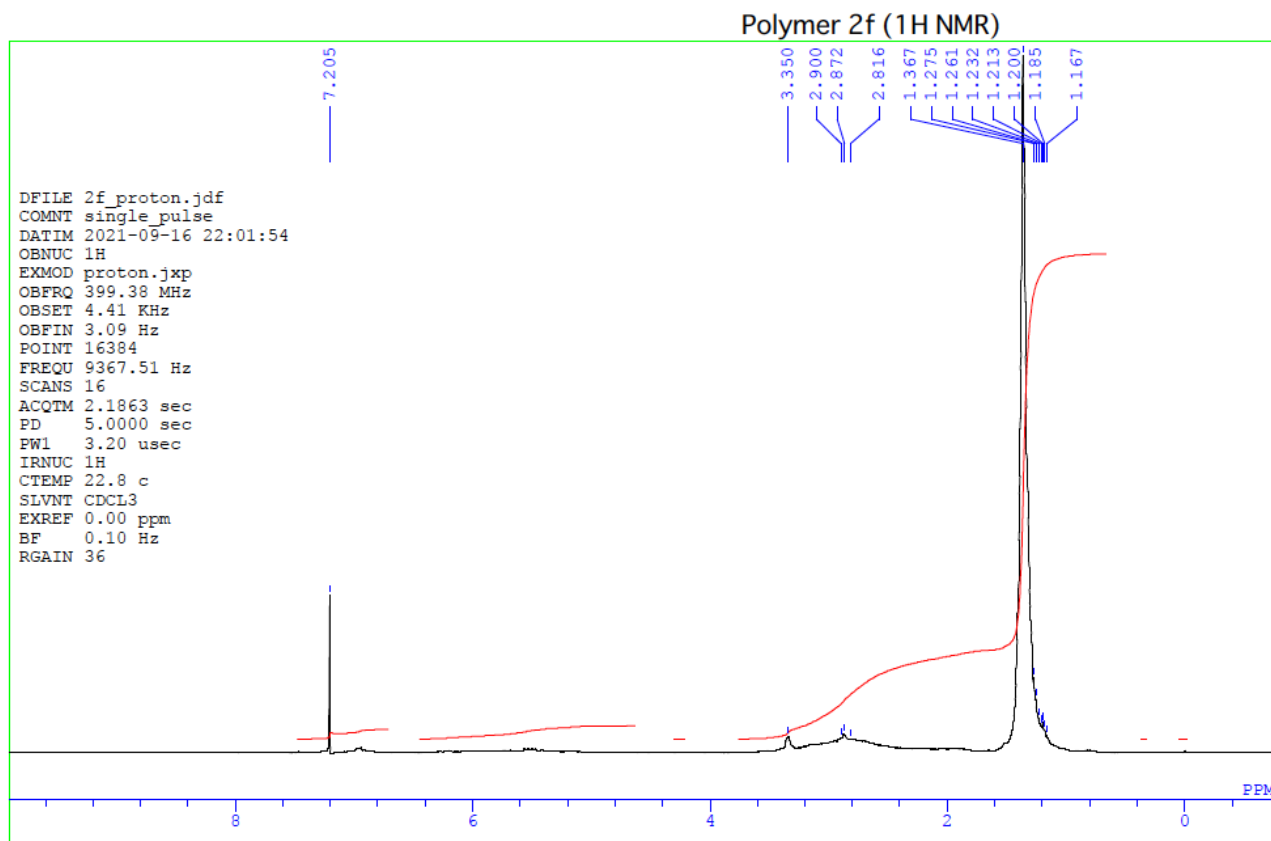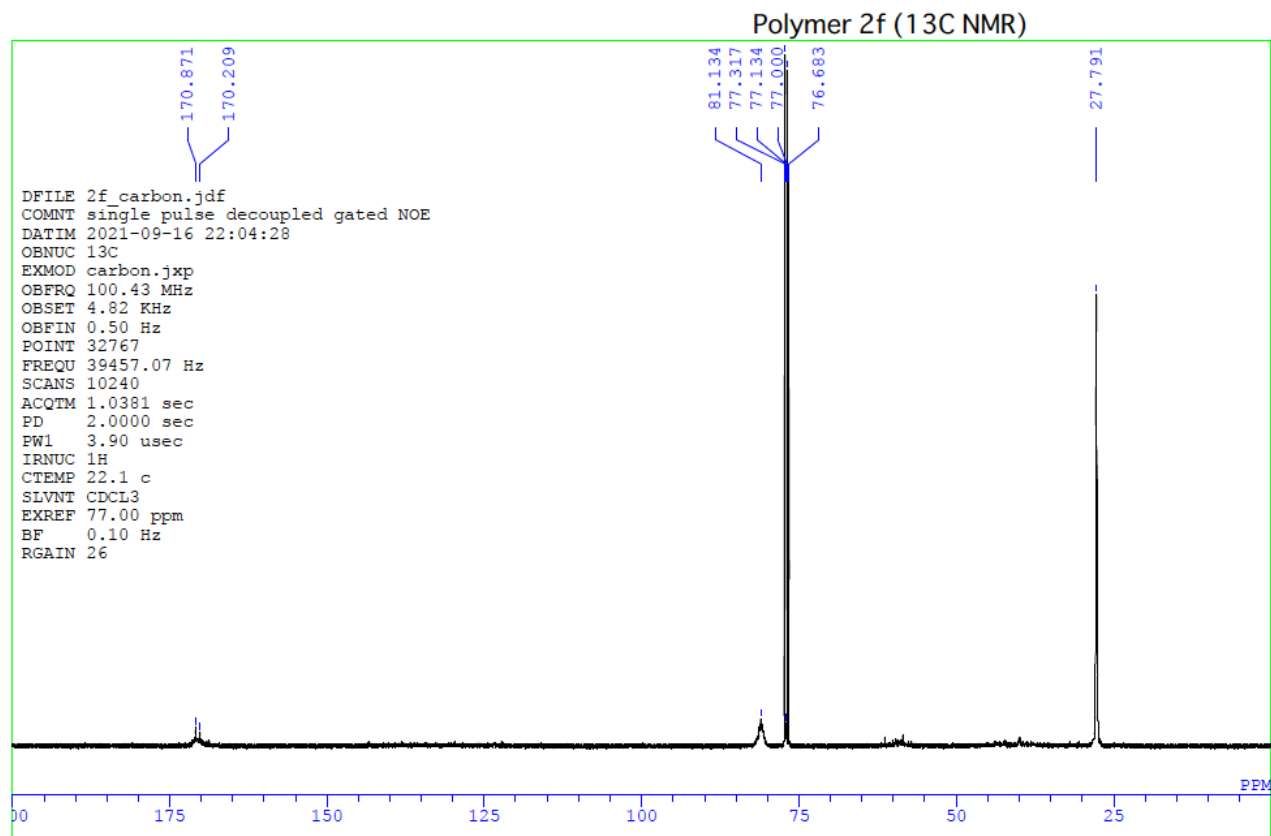

## Polymer 3a (after 30h heating of 2a)

### Polymer 3a (after 30 h heating of 2a) (1H NMR)

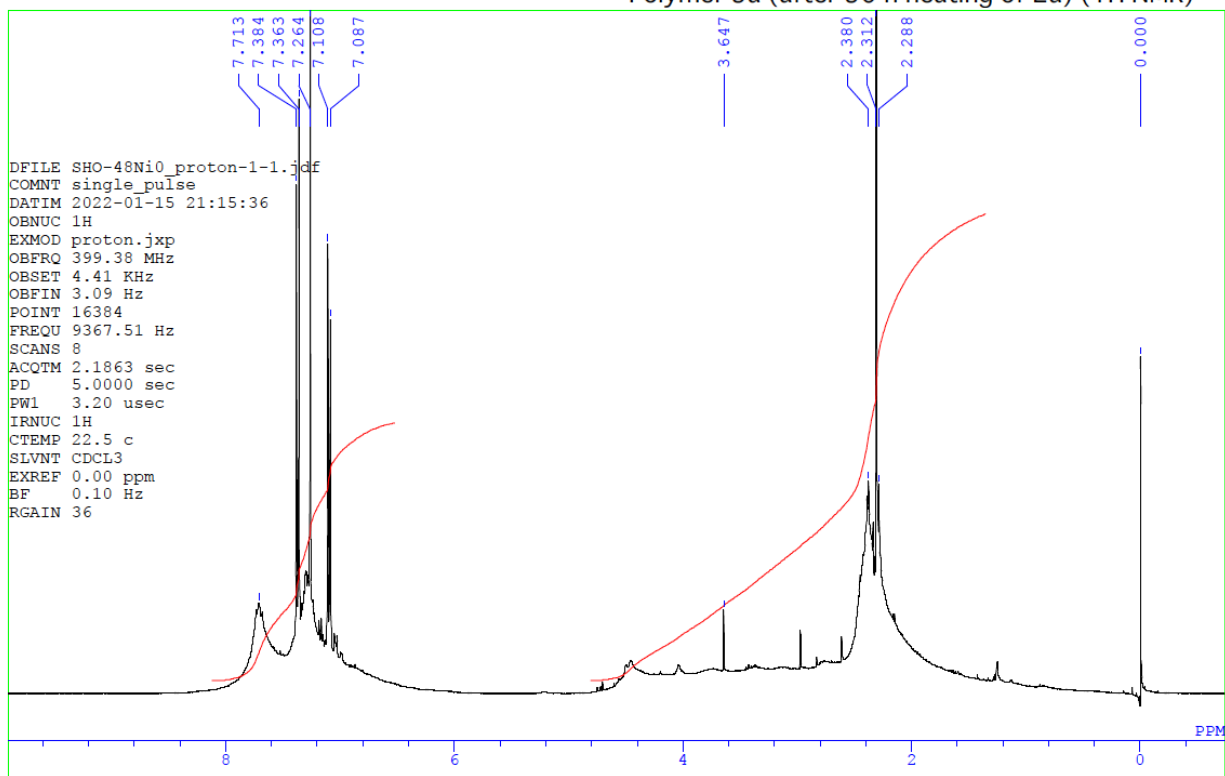

### Polymer 3a (after 30 h heating of 2a) (13C NMR)

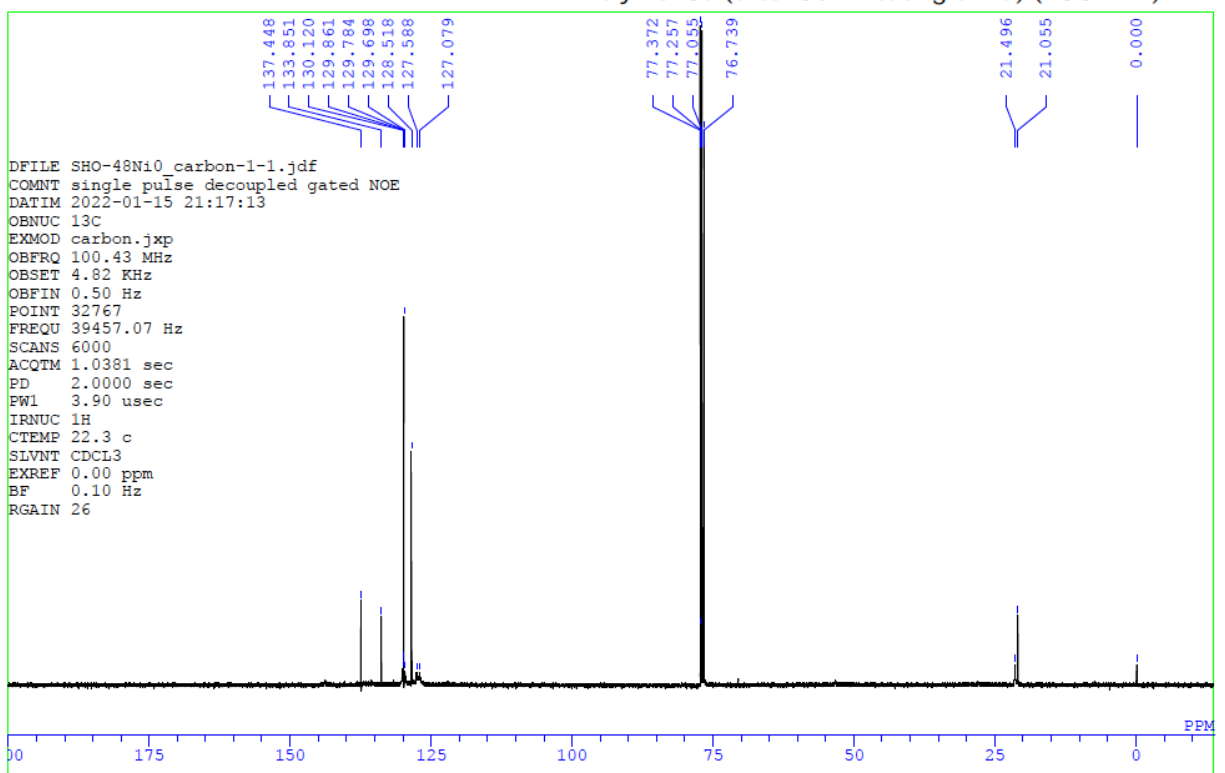

# Polymer 3a' (after 3.5h heating of 2a)

## Polymer 3a' (after 3.5 h heating of 2a) (1H NMR)

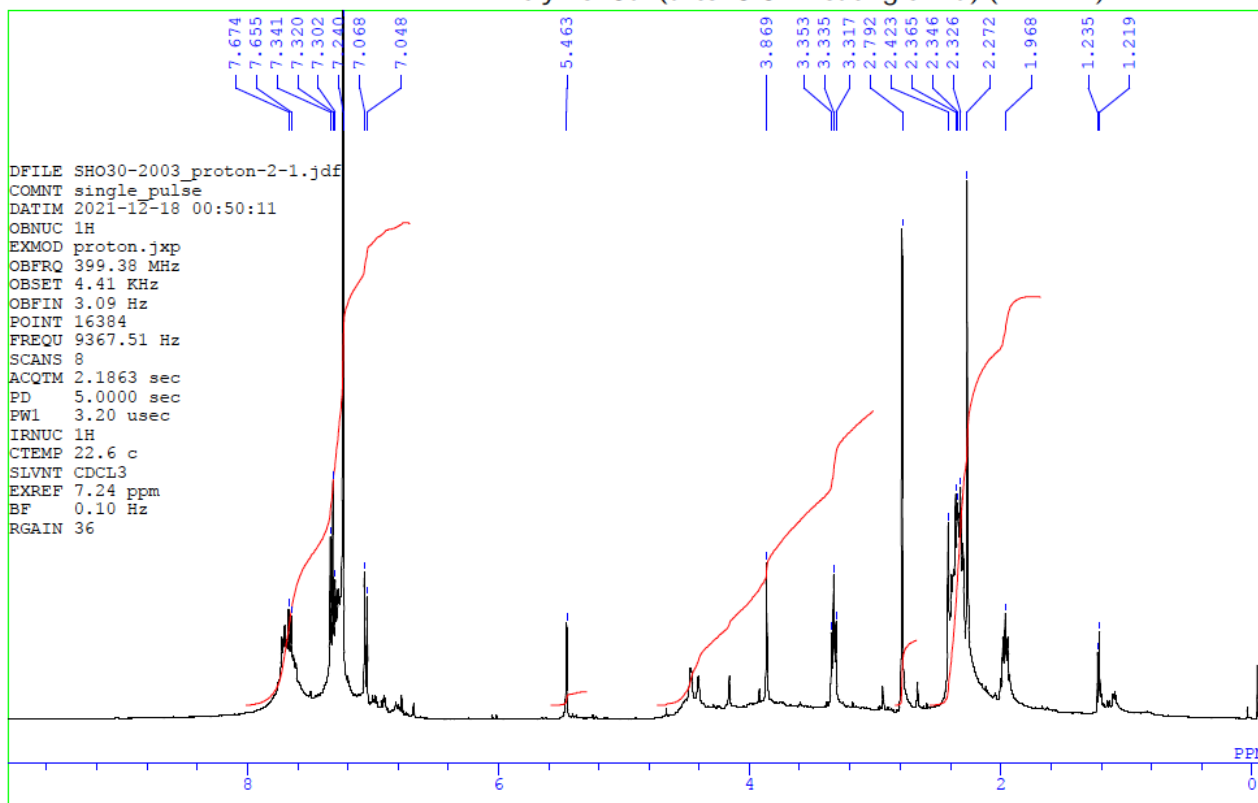

## Polymer 3a' (after 3.5 h heating of 2a) (13C NMR)

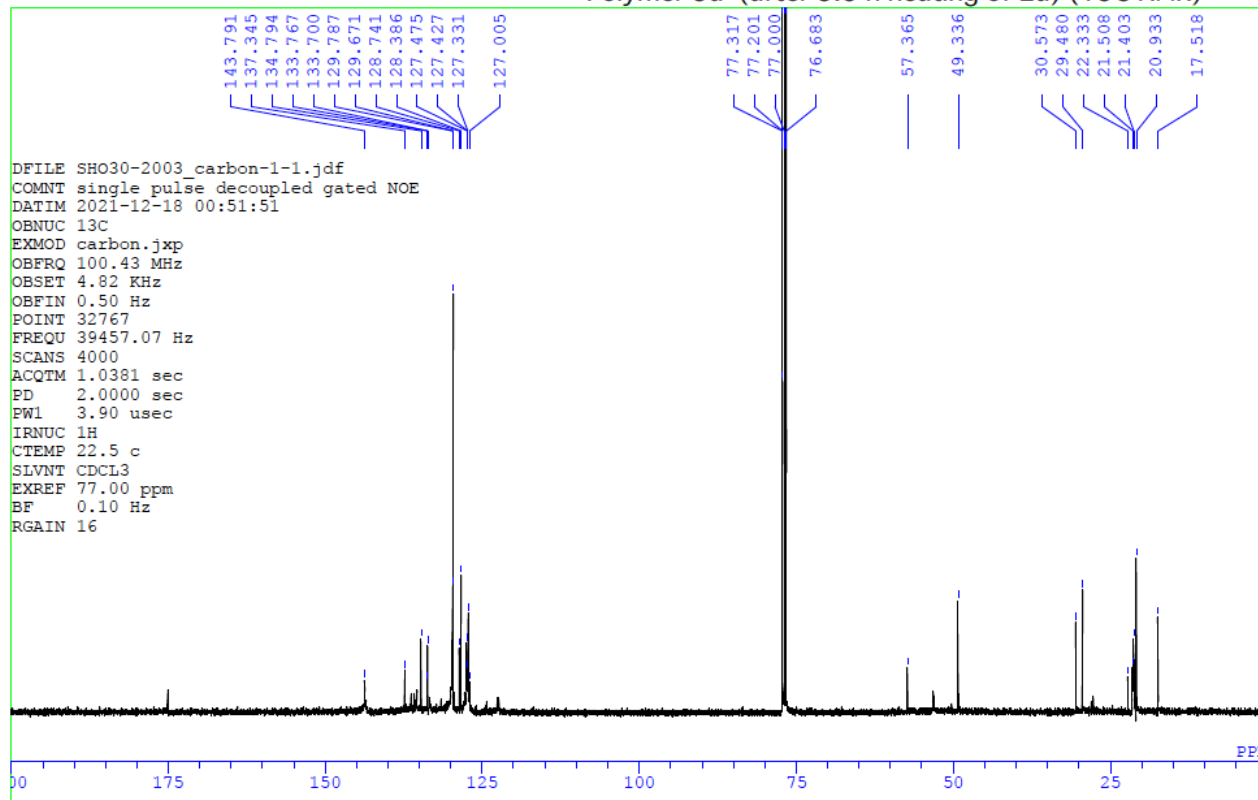

# Cyclooctatetraene 4a

## cyclooctatetraene 4a (1H NMR)

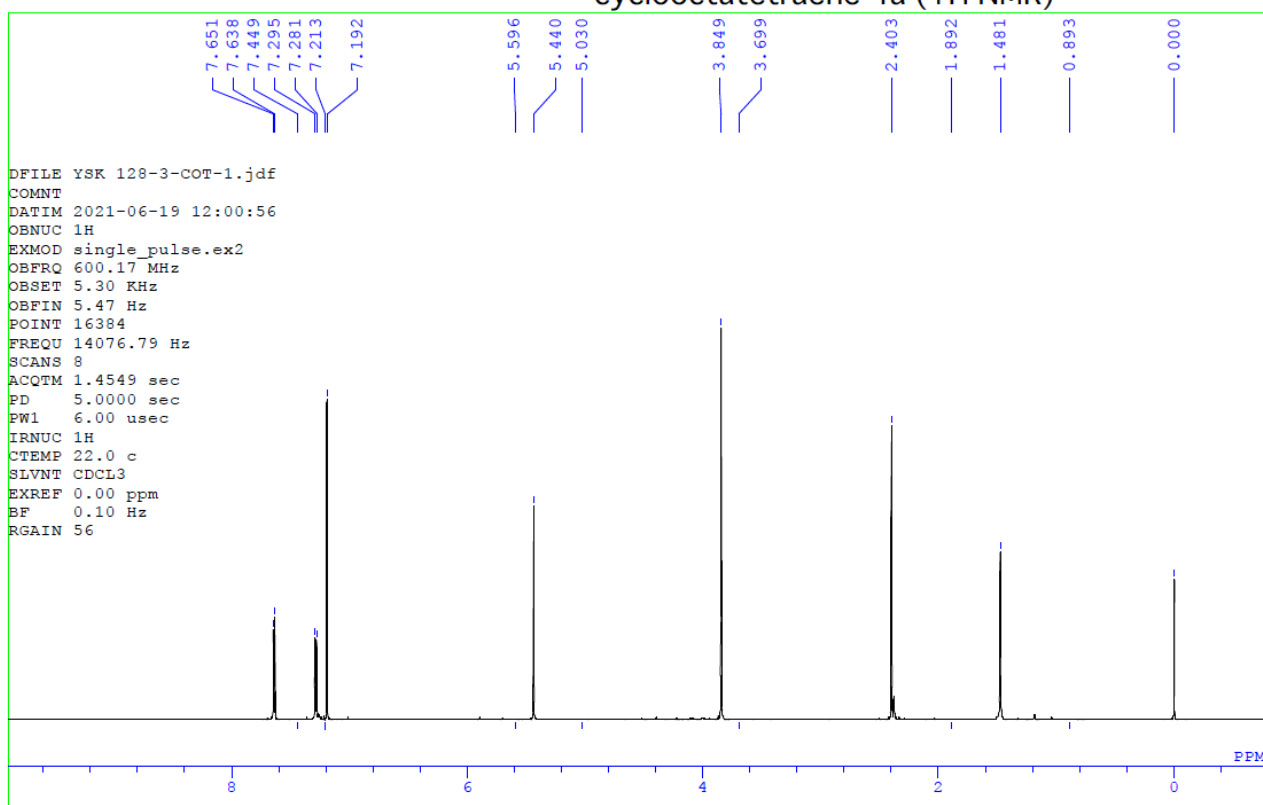





### 3a

Data: SHO-310001.N21[c] 18 Dec 2021 18:32 Cal: test 3 Sep 2019 16:59  
 Shimadzu Biotech Axima Confidence 2.9.3.20110624: Mode Linear, Power: 95, P.Ext. @ 2500 (bin 74)

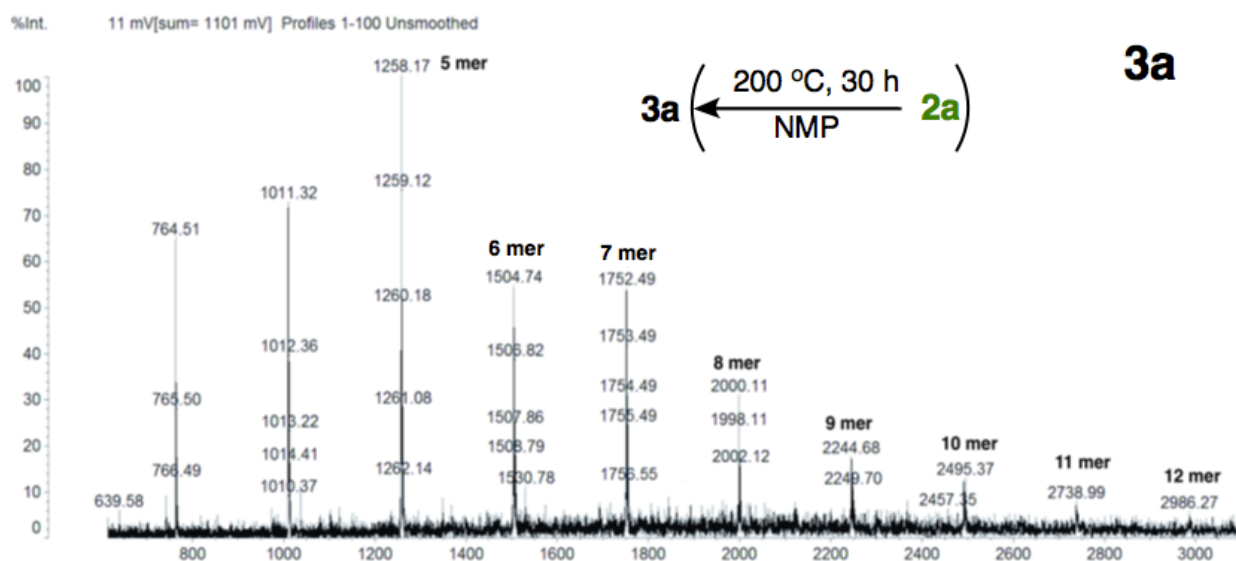

### 2a'-OH

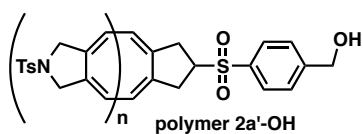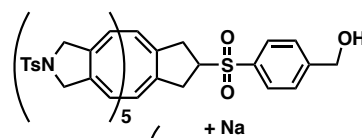

Data: YSK238-1OH0001.B17[c] 30 Jul 2021 11:35 Cal: ohta-20210610\_1K-3K 10 Jun 2021 16:10  
 Shimadzu Biotech Axima Confidence 2.9.3.20110624: Mode Reflectron, Power: 100, P.Ext. @ 2500 (bin 107)

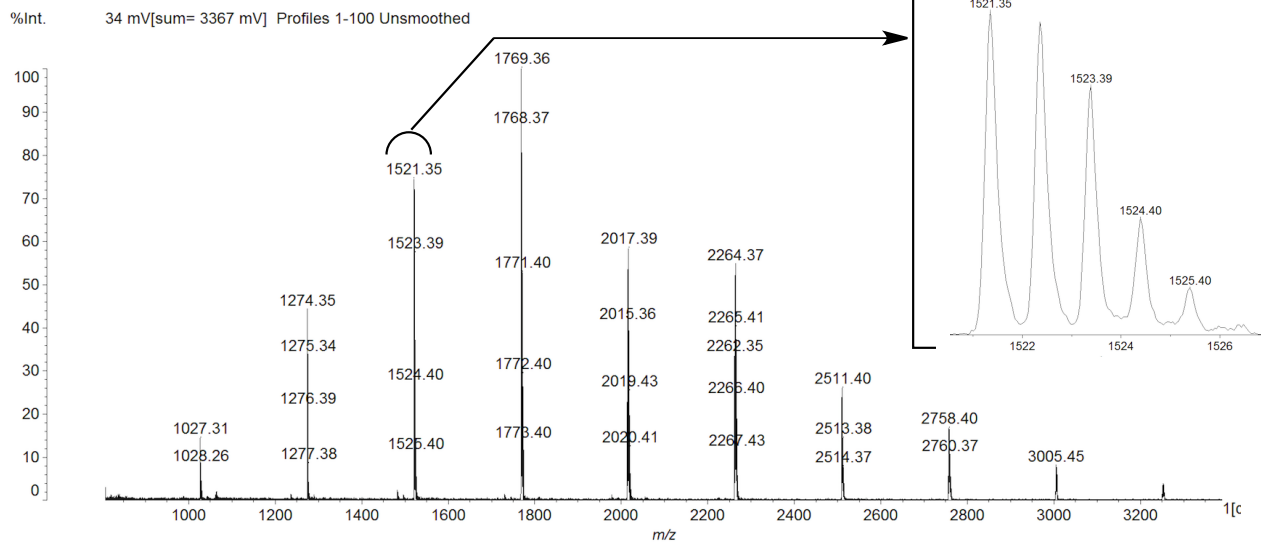

## 2b

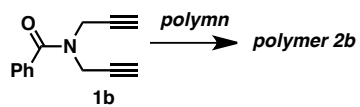

Data: YSK330-Poly0001.J22[c] 19 Mar 2022 20:52 Cal: test 3 Sep 2019 16:59  
 Shimadzu Biotech Axima Confidence 2.9.3.20110624: Mode Linear, Power: 90, P.Ext. @ 2500 (bin 74)

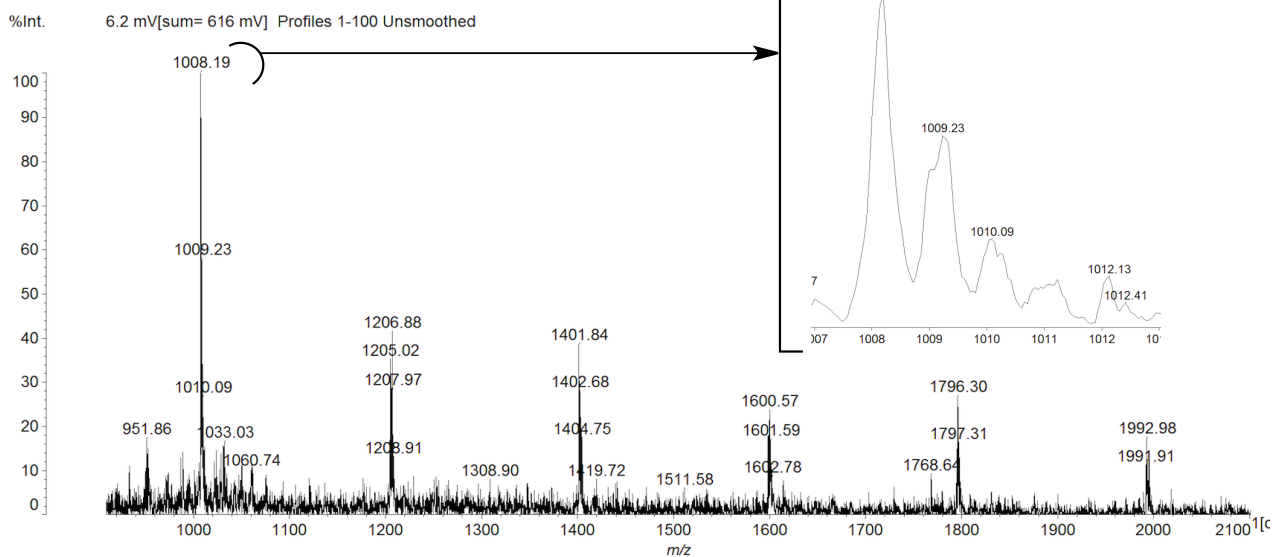

## 2c

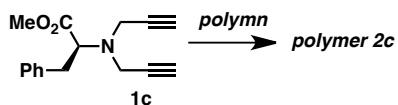

Data: YSK148-10001.A15[c] 10 Mar 2021 16:39 Cal: ohta-20210610\_1K-3K 10 Jun 2021 16:10  
 Shimadzu Biotech Axima Confidence 2.9.3.20110624: Mode Reflectron, Power: 100, P.Ext. @ 2500 (bin 107)

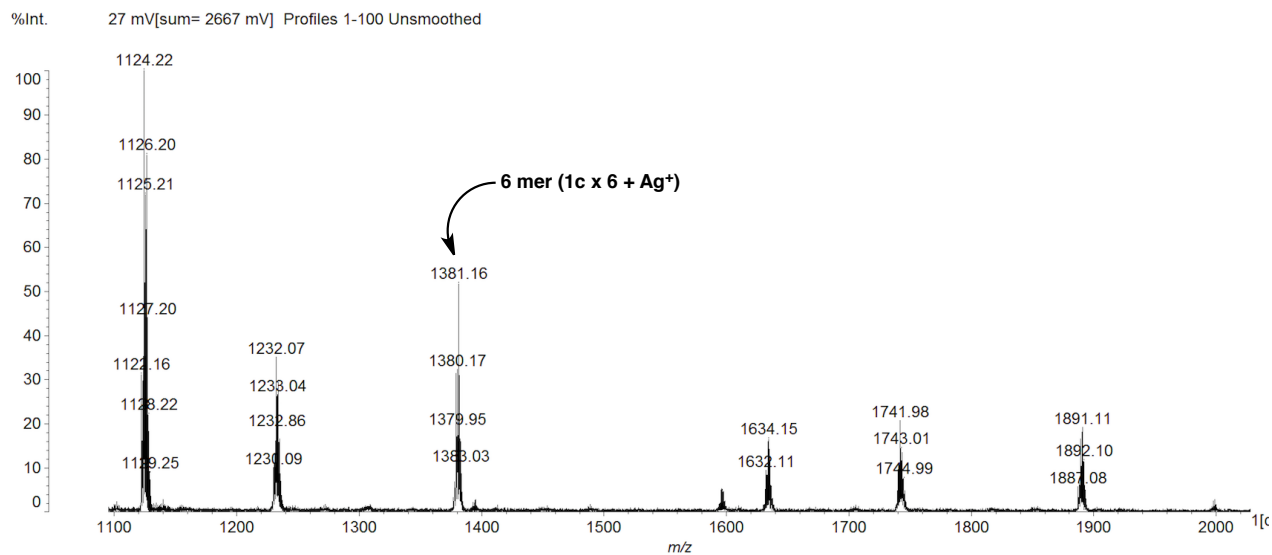

## 2d

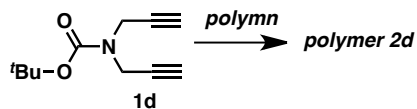

onolab/ATSUGI  
RY-II-38

Data: YSK326-20001.M22[c] 31 Jan 2022 15:10 Cal: test 3 Sep 2019 16:59  
Shimadzu Biotech Axima Confidence 2.9.3.20110624: Mode Linear, Power: 110, P.Ext. @ 2500 (bin 74)  
%Int. 39 mV[sum= 3905 mV] Profiles 1-100 Unsmoothed

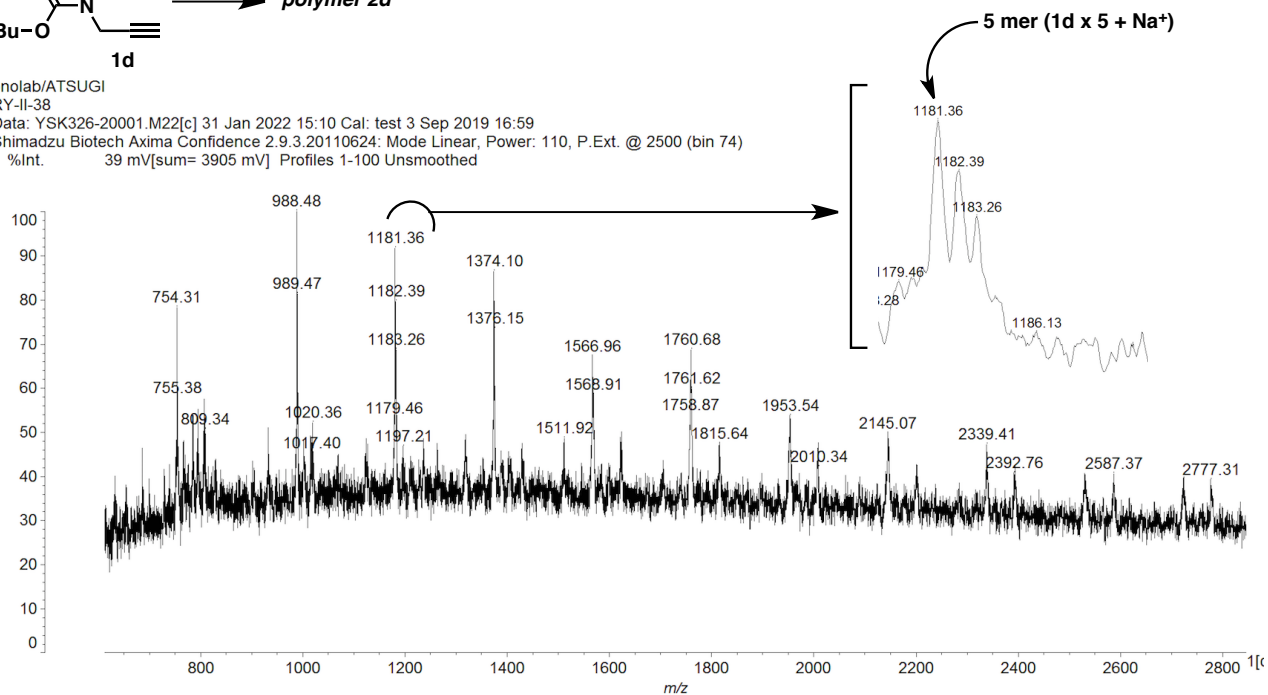

## 2e

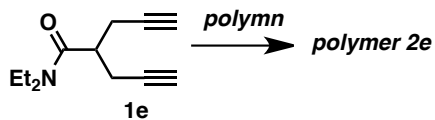

Data: YSK 292-Poly0001.H20[c] 25 Nov 2021 18:45 Cal: ohta-20210610\_1K-3K 10 Jun 2021 16:10  
Shimadzu Biotech Axima Confidence 2.9.3.20110624: Mode Reflectron, Power: 95, P.Ext. @ 2500 (bin 107)

%Int. 35 mV[sum= 3524 mV] Profiles 1-100 Unsmoothed

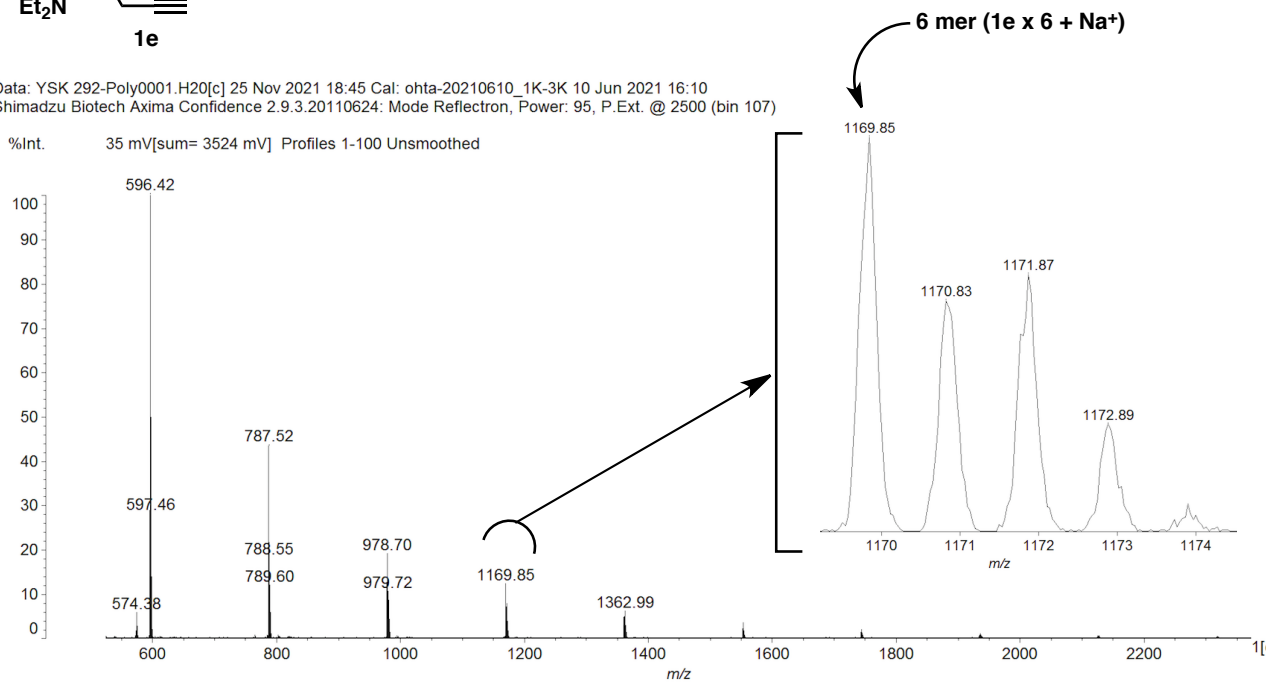

2f

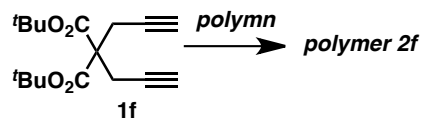

Data: YSK255-4-TFAAg-linear0001.J19[c] 5 Oct 2021 12:05 Cal: tof 24 Mar 2021 10:26  
Shimadzu Biotech Axima Confidence 2.9.3.20110624: Mode Linear, Power: 90, P.Ext. @ 2500 (bin 74)

%Int. 17 mV[sum= 1720 mV] Profiles 1-100 Unsmoothed

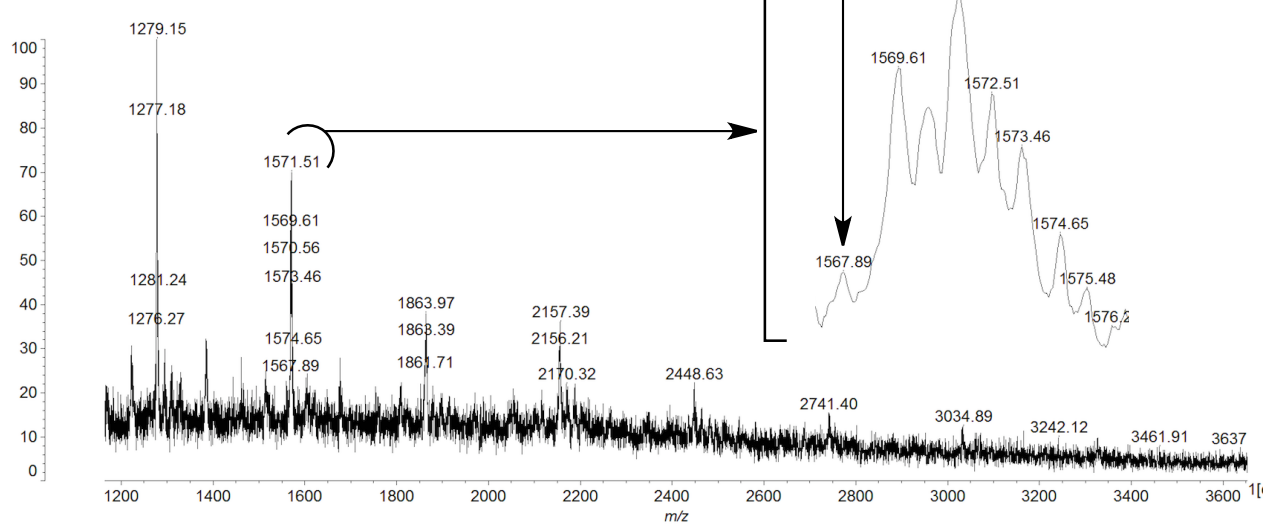

Supplement: d2py01033j1.pdf [file d2py01033j1.pdf]
